# Supplementary material for: A novel biorefinery concept based on marginally used halophyte biomass
Source: Royal Society of Chemistry journal article supplement (doi:10.1039/d3se00458a), 2023-01-01
Supplement: d3se00458a1.pdf [file d3se00458a1.pdf]

## **A novel biorefinery concept based on marginally used halophyte biomass**

Maxwel Monção,<sup>a</sup> Petter Paulsen Thoresen,<sup>a</sup> Tobias Wretborn,<sup>a</sup> Heiko Lange,<sup>a,b,c</sup> Ulrika Rova,<sup>a</sup> Paul Christakopoulos<sup>a</sup> and Leonidas Matsakas<sup>a,\*</sup>

<sup>a</sup> Biochemical Process Engineering, Division of Chemical Engineering, Department of Civil, Environmental and Natural Resources Engineering, Luleå University of Technology, SE-971 87 Luleå, Sweden

<sup>b</sup> Department of Earth and Environmental Sciences, University of Milano-Bicocca, Piazza della Scienza 1, 20126 Milan, Italy

<sup>c</sup> NBFC – National Biodiversity Future Center, 90133 Palermo, Italy

\*Corresponding author: Leonidas Matsakas, Department of Civil, Environmental and Natural Resources Engineering, SE-971 87 Luleå Sweden, leonidas.matsakas@ltu.se, tel.: +46 (0) 920 493043

## List of supplementary figures:

|                                                                                                                                                                                                                                                   |    |
|---------------------------------------------------------------------------------------------------------------------------------------------------------------------------------------------------------------------------------------------------|----|
| <b>Figure S1:</b> Base peak chromatogram of <i>S. ramosissima</i> pretreated at 180 °C for 30 min with 60% ethanol; the MS2 inserts show the major glycans at m/z 367 and 353. Optional interpretations are shown. ....                           | 3  |
| <b>Figure S2:</b> Combined mass spectra and base peak chromatogram of <i>S. ramosissima</i> pretreated at 160 °C for 30 min with 60% ethanol; the MS2 inserts show the major glycans at m/z 501 and 563. Optional interpretations are shown. .... | 3  |
| <b>Figure S3:</b> Base peak chromatograms of <i>S. ramosissima</i> pretreated at 180 °C for 15 min with 40% and 60% ethanol, as well as at 180 °C for 30 min with 40% ethanol. The samples were analyzed in negative ion mode. ....               | 4  |
| <b>Figure S4:</b> HSQC and quantitative <sup>13</sup> C NMR spectra of lignin sample 0A4. ....                                                                                                                                                    | 5  |
| <b>Figure S5:</b> HSQC and quantitative <sup>13</sup> C NMR spectra of lignin sample 0A6. ....                                                                                                                                                    | 6  |
| <b>Figure S6:</b> HSQC and quantitative <sup>13</sup> C NMR spectra of lignin sample 0B4. ....                                                                                                                                                    | 7  |
| <b>Figure S7:</b> HSQC and quantitative <sup>13</sup> C NMR spectra of lignin sample 0B6. ....                                                                                                                                                    | 8  |
| <b>Figure S8:</b> HSQC and quantitative <sup>13</sup> C NMR spectra of lignin sample 0C4. ....                                                                                                                                                    | 9  |
| <b>Figure S9:</b> HSQC and quantitative <sup>13</sup> C NMR spectra of lignin sample 0C6. ....                                                                                                                                                    | 10 |
| <b>Figure S10:</b> HSQC and quantitative <sup>13</sup> C NMR spectra of lignin sample 1A4. ....                                                                                                                                                   | 11 |
| <b>Figure S11:</b> HSQC and quantitative <sup>13</sup> C NMR spectra of lignin sample 1A6. ....                                                                                                                                                   | 12 |
| <b>Figure S12:</b> HSQC and quantitative <sup>13</sup> C NMR spectra of lignin sample 1B4. ....                                                                                                                                                   | 13 |
| <b>Figure S13:</b> HSQC and quantitative <sup>13</sup> C NMR spectra of lignin sample 1B6. ....                                                                                                                                                   | 14 |
| <b>Figure S14:</b> HSQC and quantitative <sup>13</sup> C NMR spectra of lignin sample 1C4. ....                                                                                                                                                   | 15 |
| <b>Figure S15:</b> HSQC and quantitative <sup>13</sup> C NMR spectra of lignin sample 1C6. ....                                                                                                                                                   | 16 |
| <b>Figure S16:</b> HSQC and quantitative <sup>13</sup> C NMR spectra of lignin sample 1D4. ....                                                                                                                                                   | 17 |
| <b>Figure S17:</b> HSQC and quantitative <sup>13</sup> C NMR spectra of lignin sample 1D6. ....                                                                                                                                                   | 18 |
| <b>Figure S18:</b> HSQC and quantitative <sup>13</sup> C NMR spectra of lignin sample 2B4. ....                                                                                                                                                   | 19 |
| <b>Figure S19:</b> HSQC and quantitative <sup>13</sup> C NMR spectra of lignin sample 2B6. ....                                                                                                                                                   | 20 |

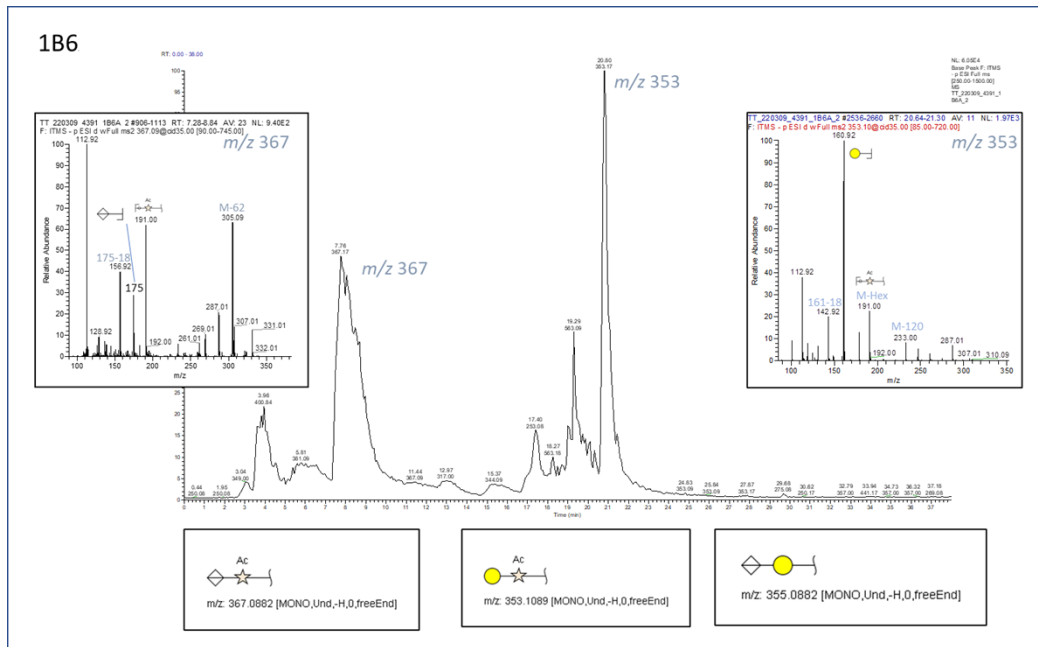

**Figure S1:** Base peak chromatogram of *S. ramosissima* pretreated at 180 °C for 30 min with 60% ethanol; the MS2 inserts show the major glycans at  $m/z$  367 and 353. Optional interpretations are shown.

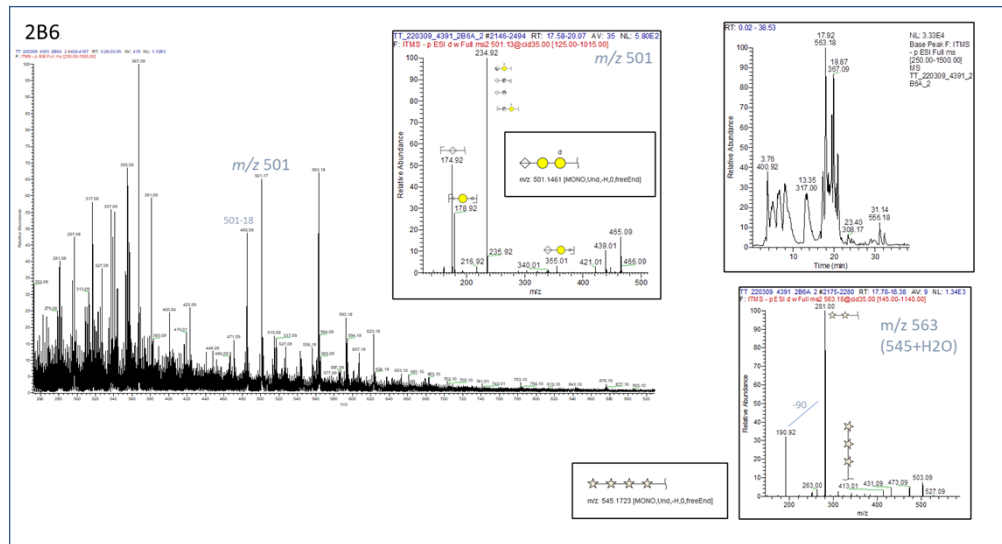

**Figure S2:** Combined mass spectra and base peak chromatogram of *S. ramosissima* pretreated at 160 °C for 30 min with 60% ethanol; the MS2 inserts show the major glycans at  $m/z$  501 and 563. Optional interpretations are shown.

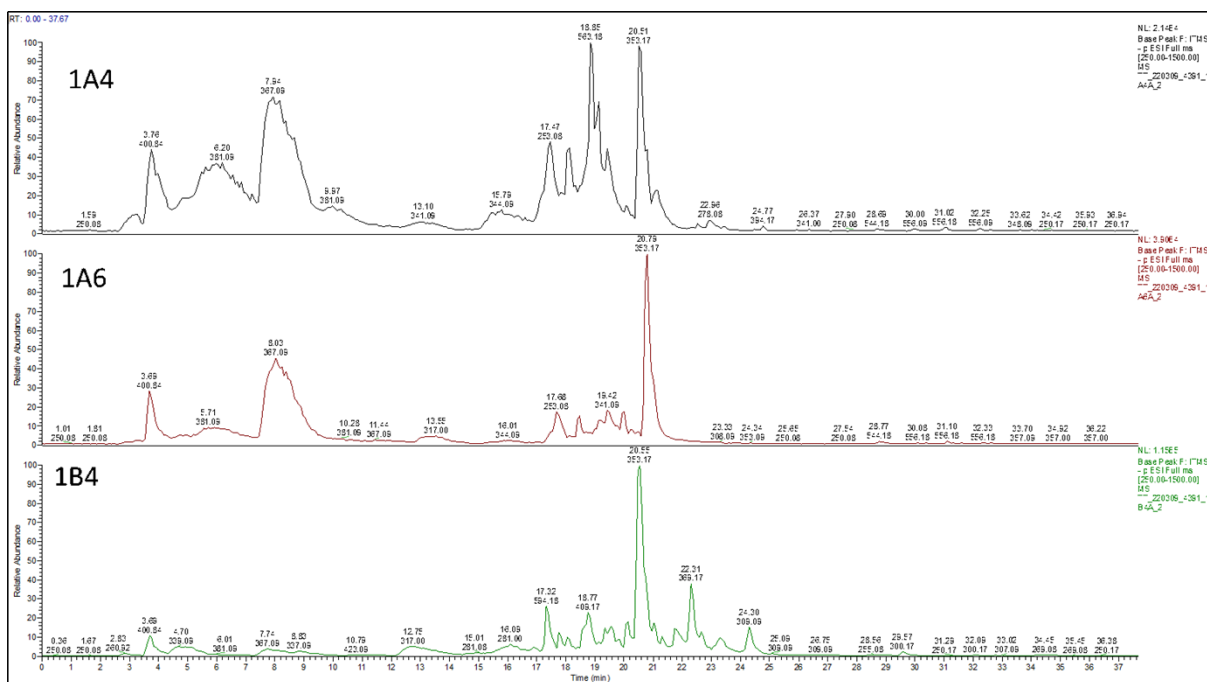

**Figure S3:** Base peak chromatograms of *S. ramosissima* pretreated at 180 °C for 15 min with 40% and 60% ethanol, as well as at 180 °C for 30 min with 40% ethanol. The samples were analyzed in negative ion mode.

PT04.1\_Lignin\_quant13C\_HSQC/HSQC 0A4a  
Title 0A4

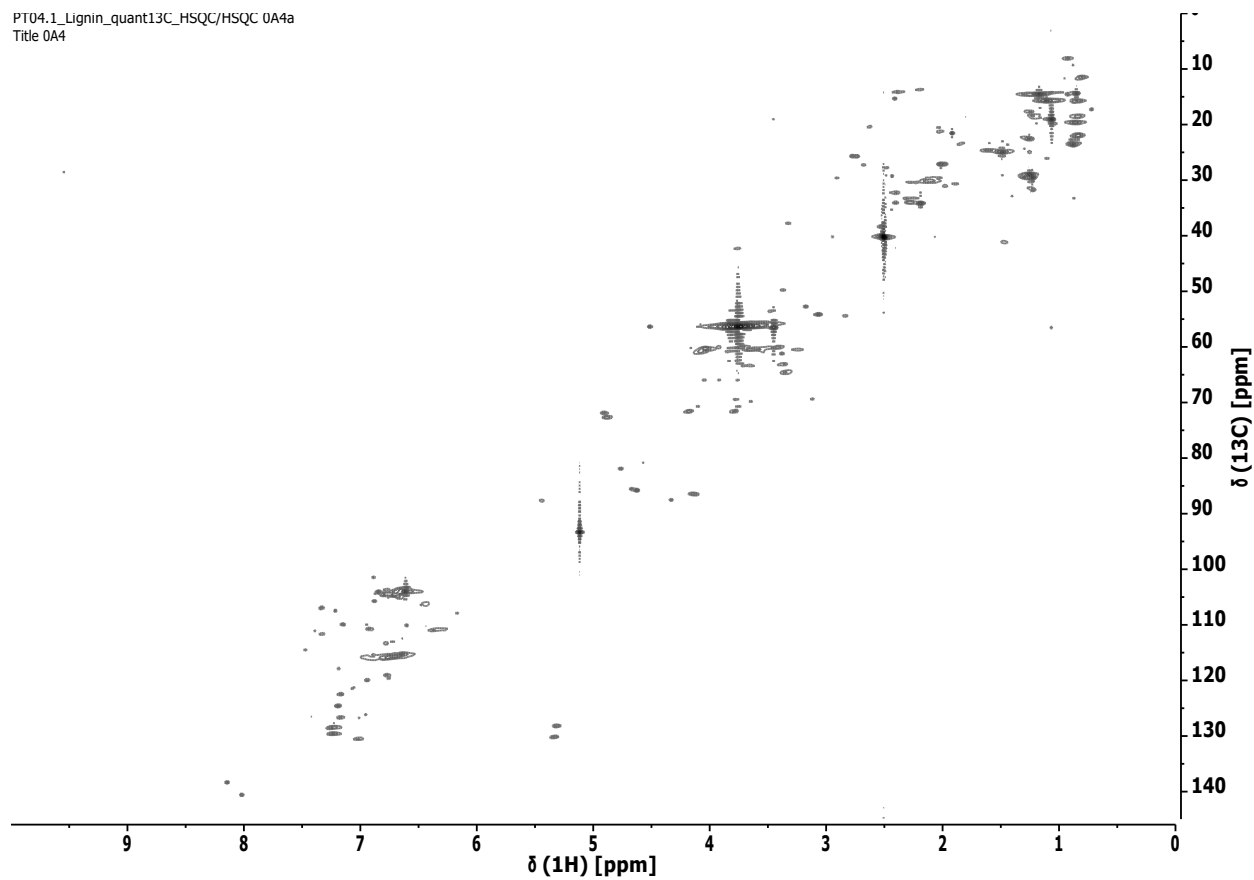

PT04.1\_Lignin\_quant13C\_HSQC/13C 0A4a  
Title 0A4

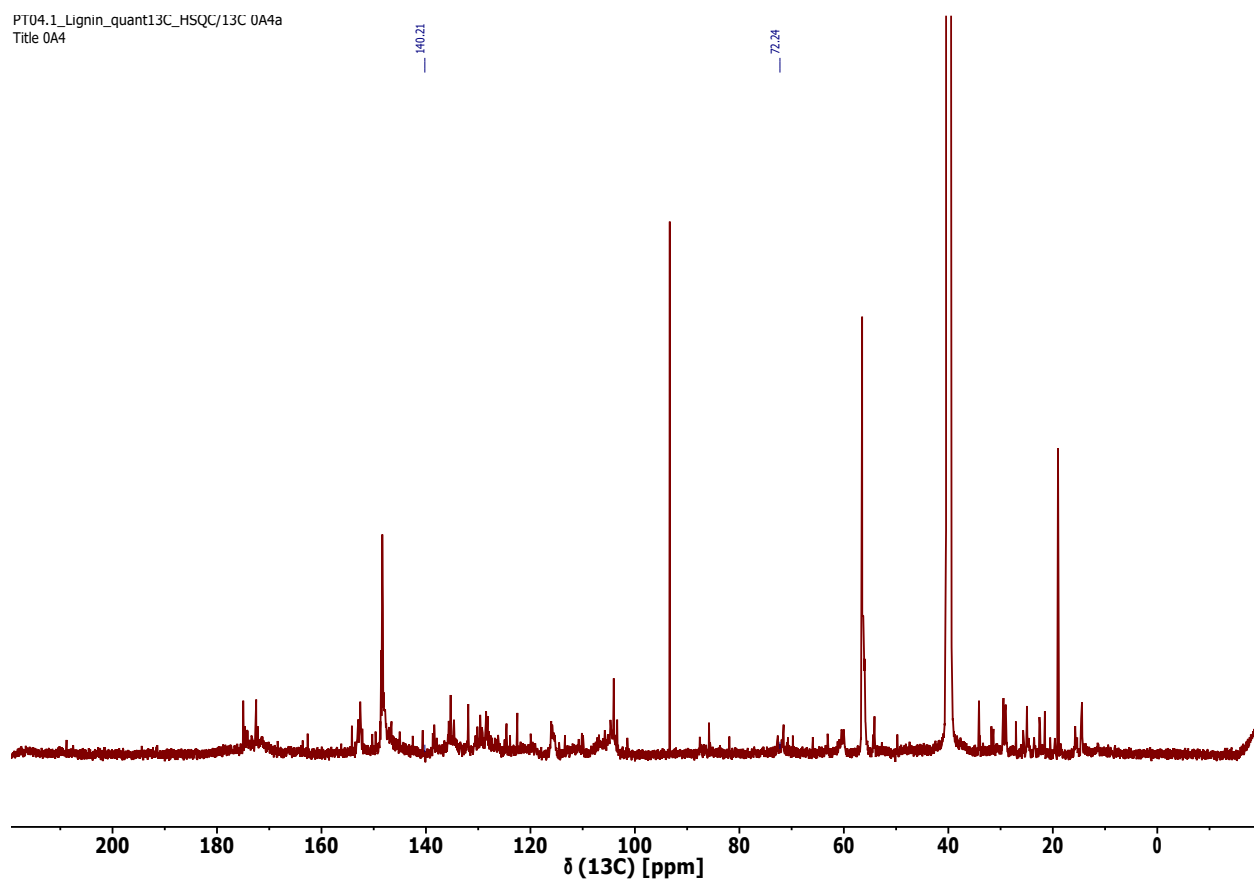

Figure S4: HSQC and quantitative <sup>13</sup>C NMR spectra of lignin sample 0A4.

PT04.1\_Lignin\_quant13C\_HSQC/HSQC 0A6a  
Title 0A6

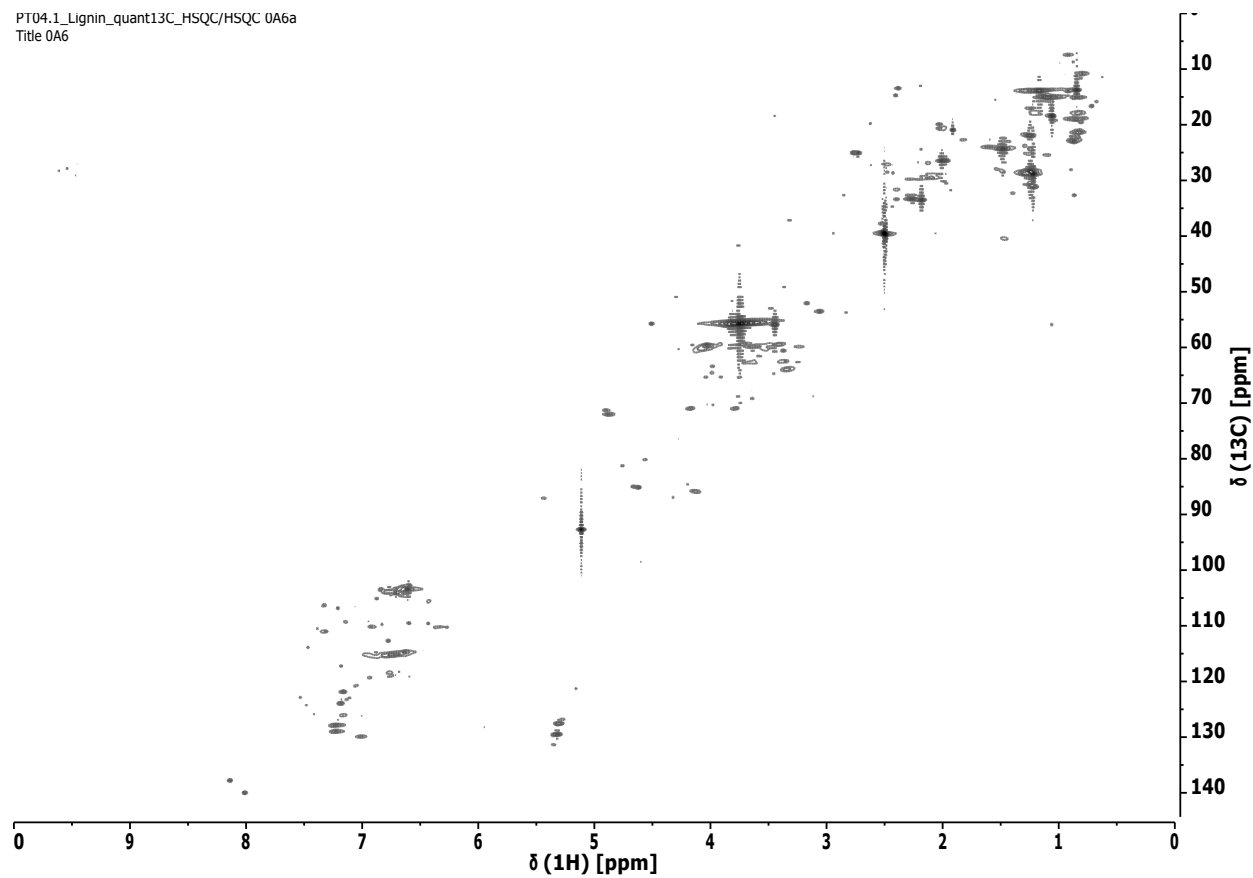

PT04.1\_Lignin\_quant13C\_HSQC/13C 0A6a  
Title 0A6

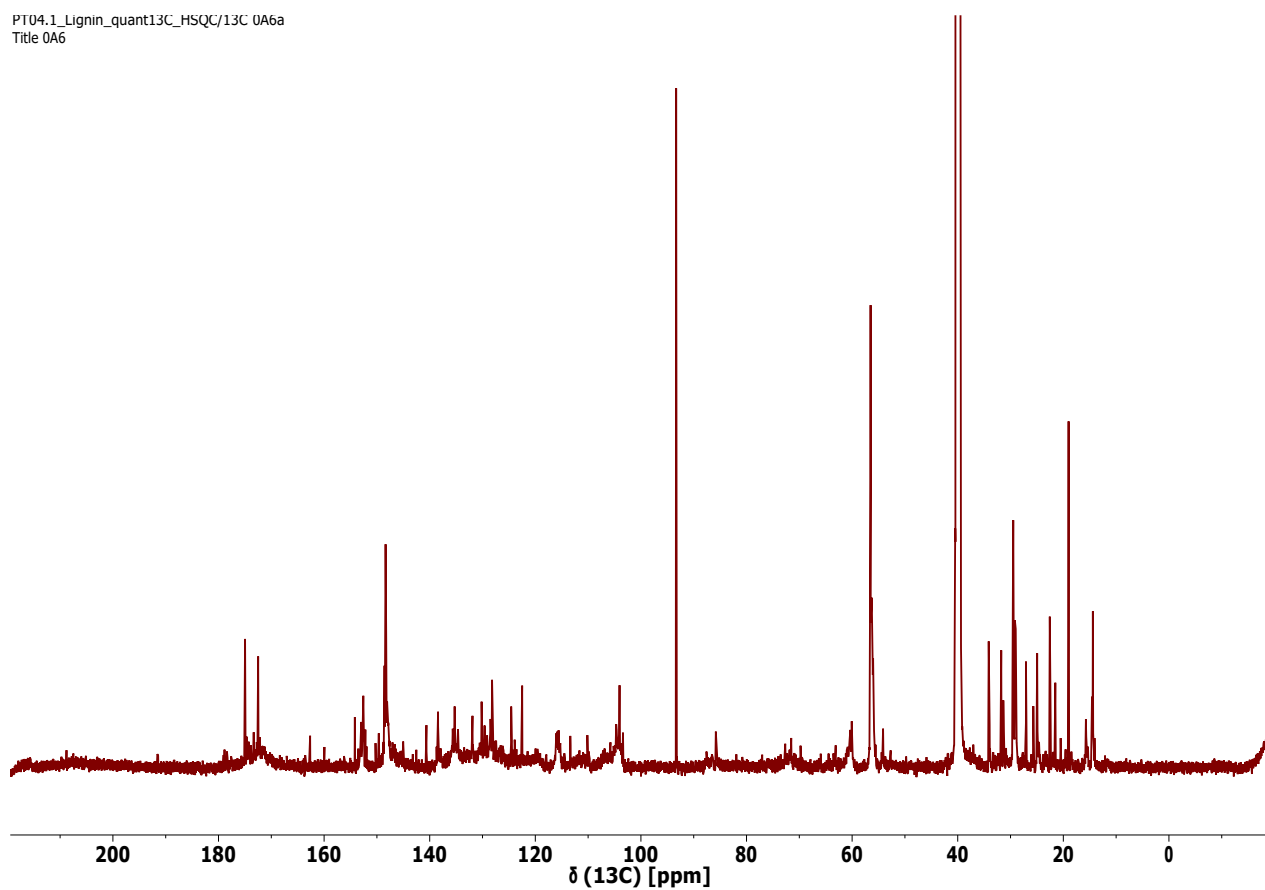

Figure S5: HSQC and quantitative  $^{13}\text{C}$  NMR spectra of lignin sample 0A6.

PT04.1\_Lignin\_quant13C\_HSQC/HSQC 0B4a  
Title 0B4

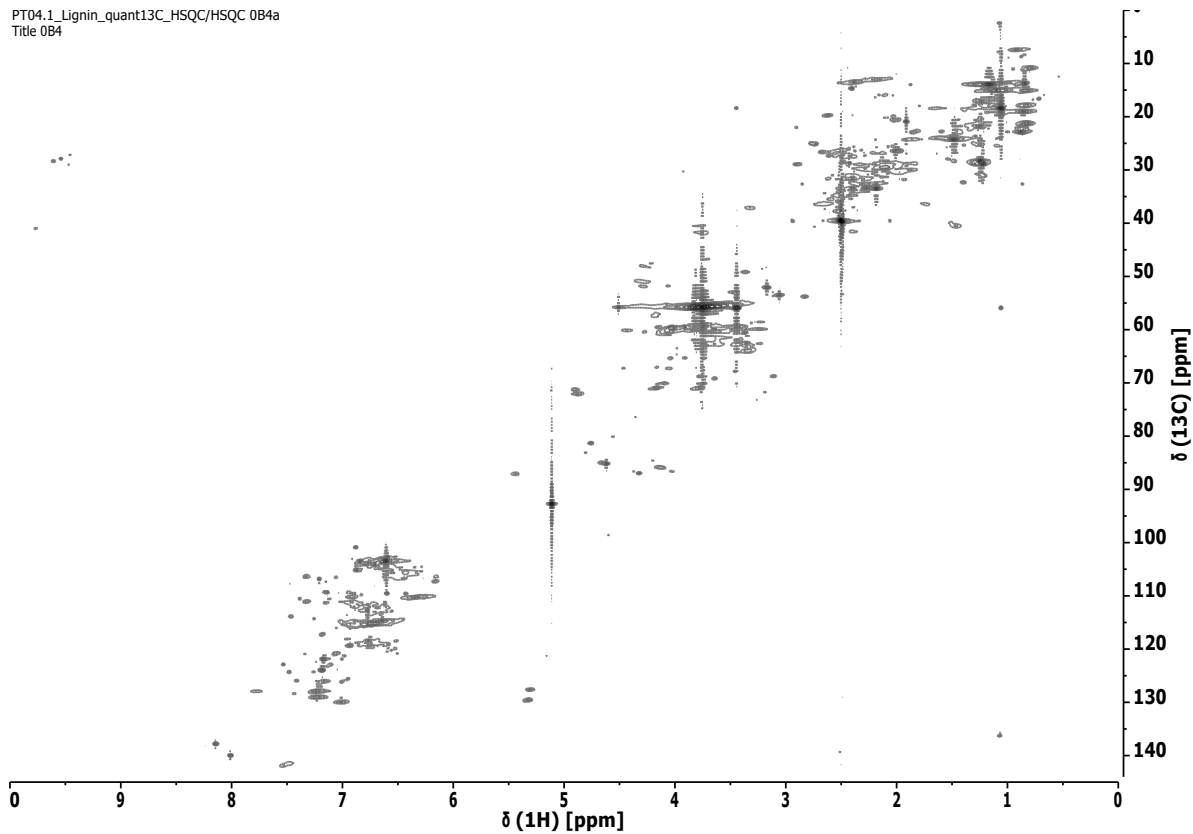

PT04.1\_Lignin\_quant13C\_HSQC/13C 0B4a  
Title 0B4

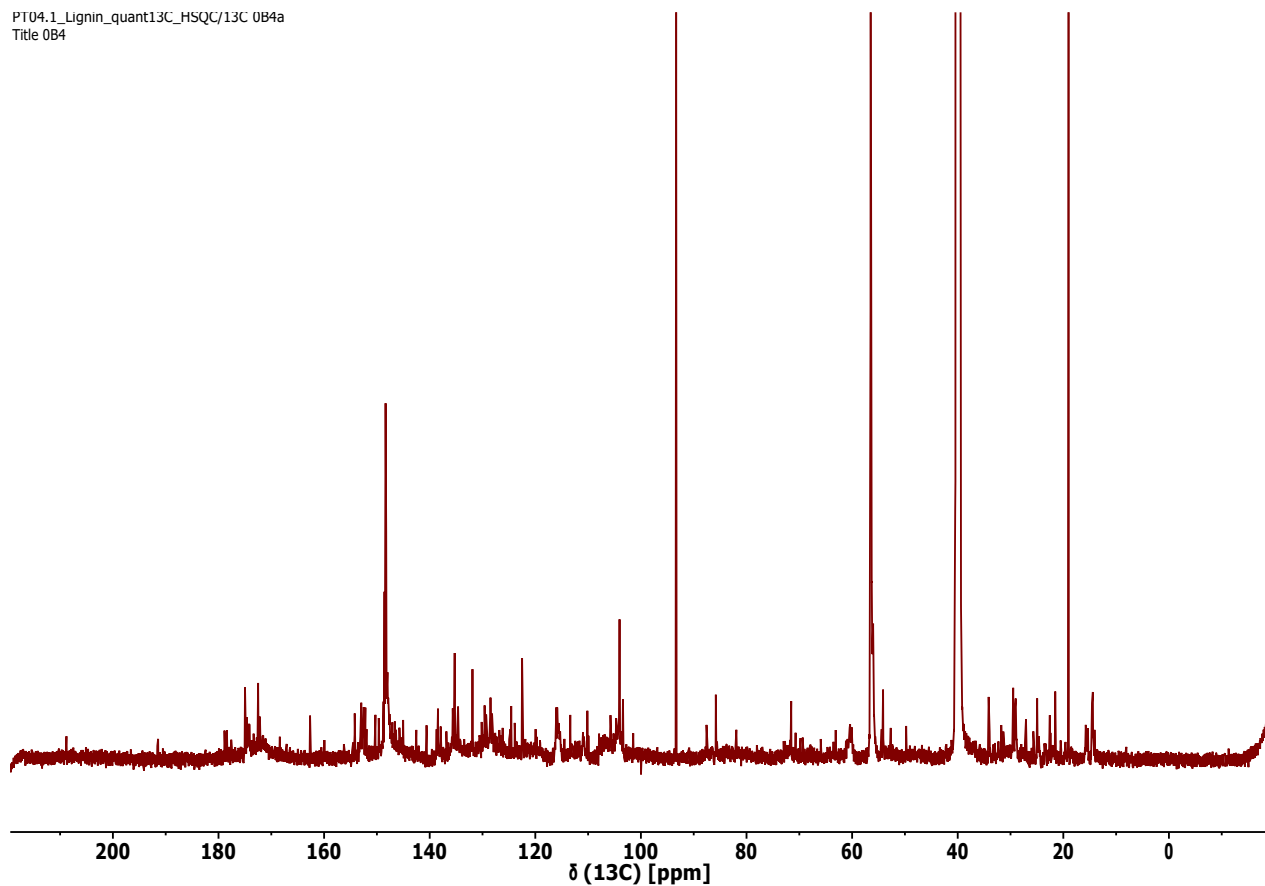

Figure S6: HSQC and quantitative <sup>13</sup>C NMR spectra of lignin sample 0B4.

PT04.1\_Lignin\_quant13C\_HSQC/HSQC 0B6a  
Title 0B6

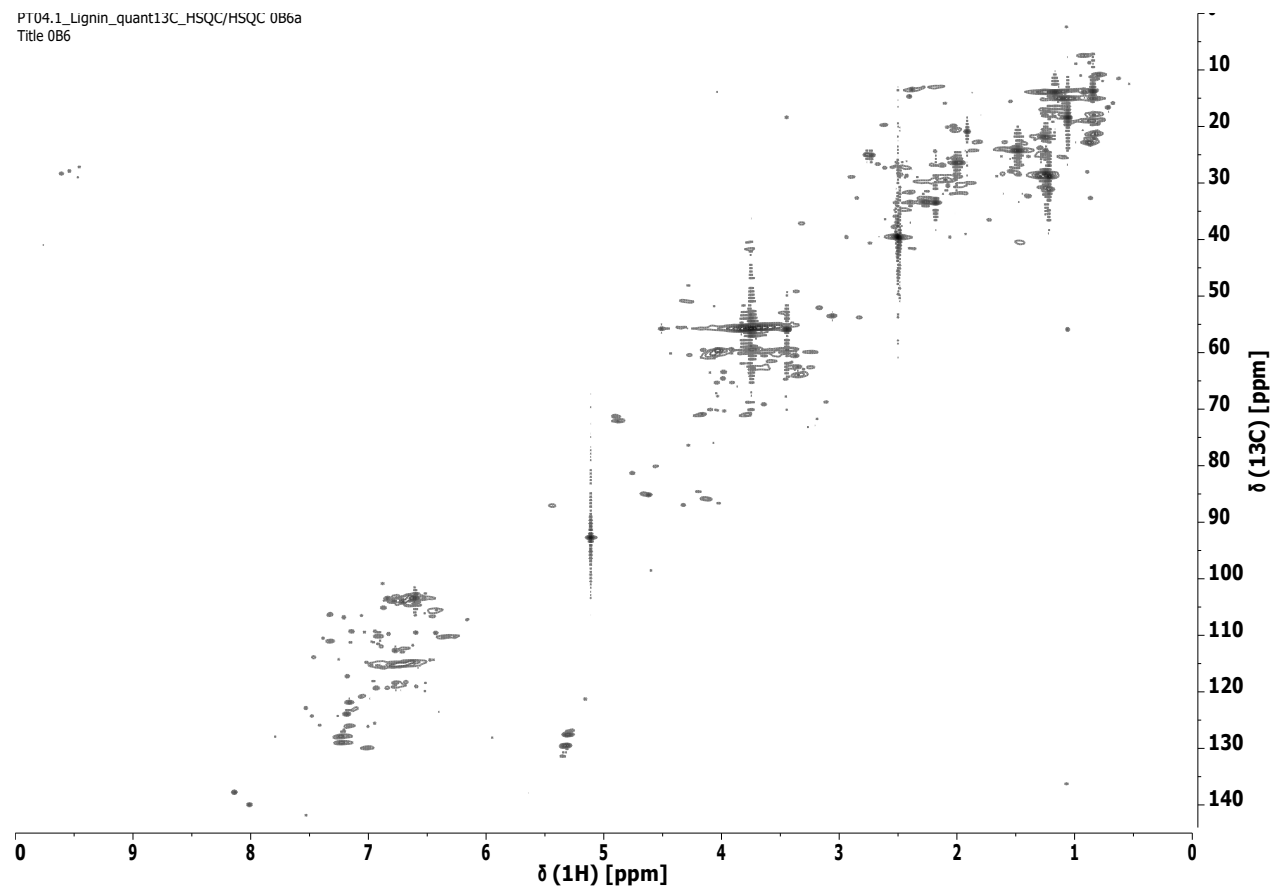

PT04.1\_Lignin\_quant13C\_HSQC/13C 0B6a  
Title 0B6

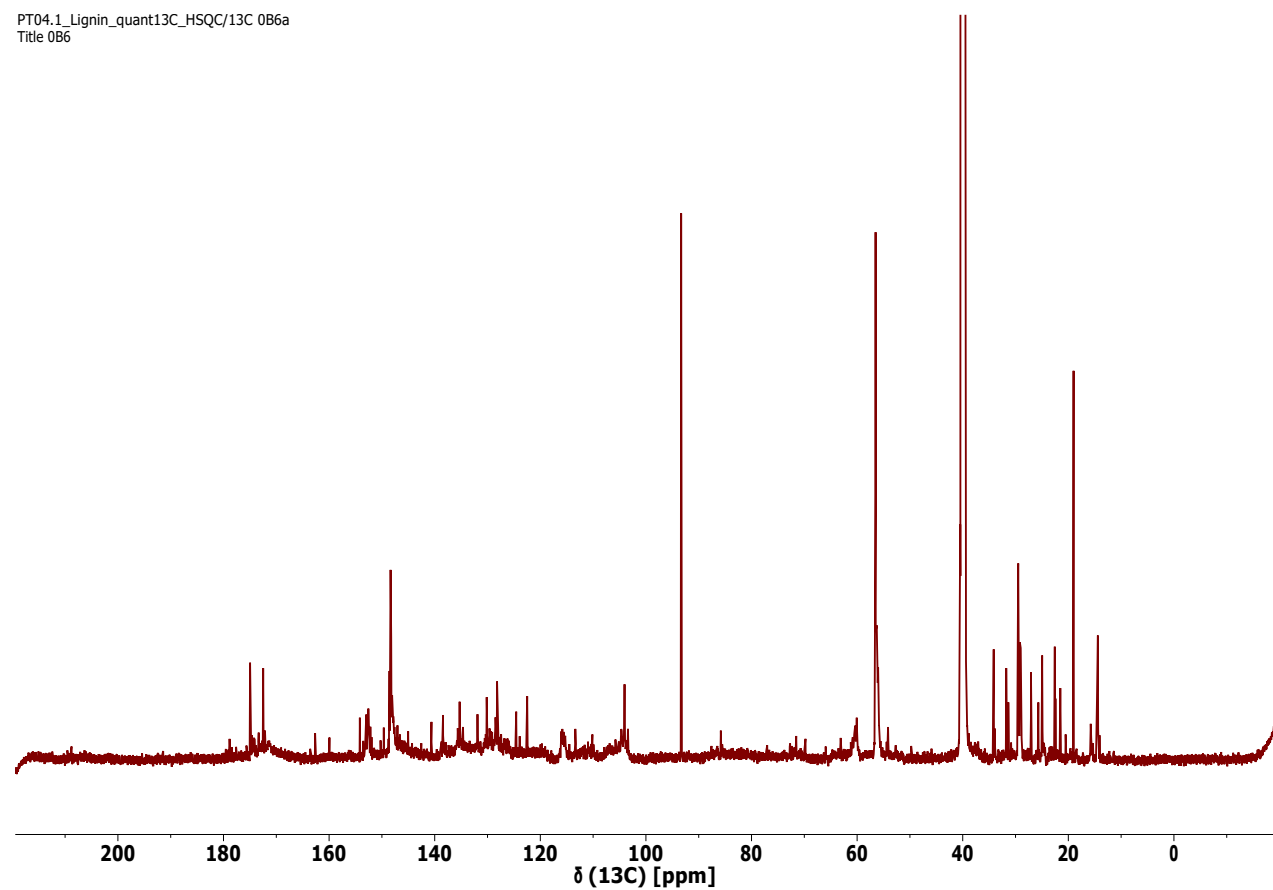

Figure S7: HSQC and quantitative  $^{13}\text{C}$  NMR spectra of lignin sample 0B6.



PT04.1\_Lignin\_quant13C\_HSQC/HSQC 0C4a  
Title 0C4

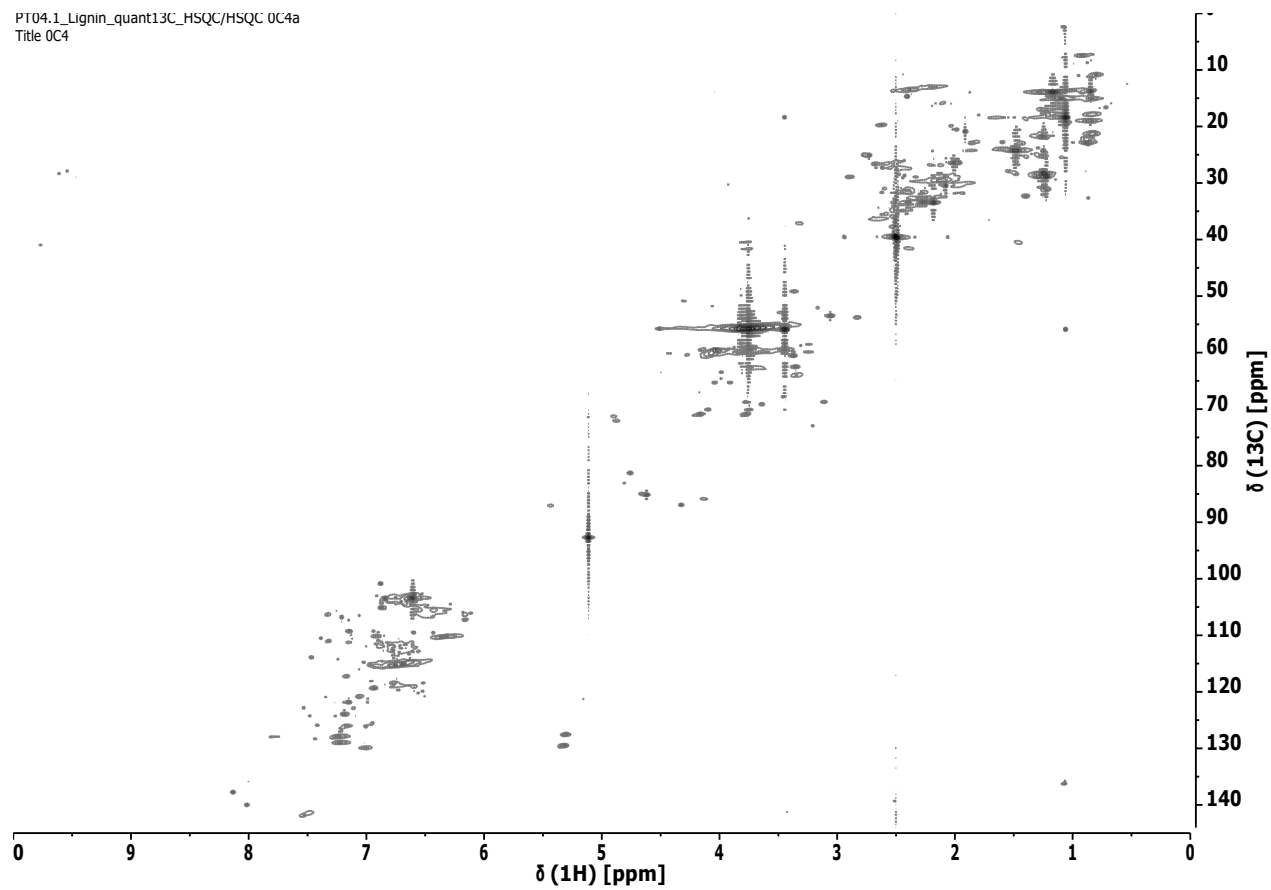

PT04.1\_Lignin\_quant13C\_HSQC/13C 0C4a  
Title 0C4

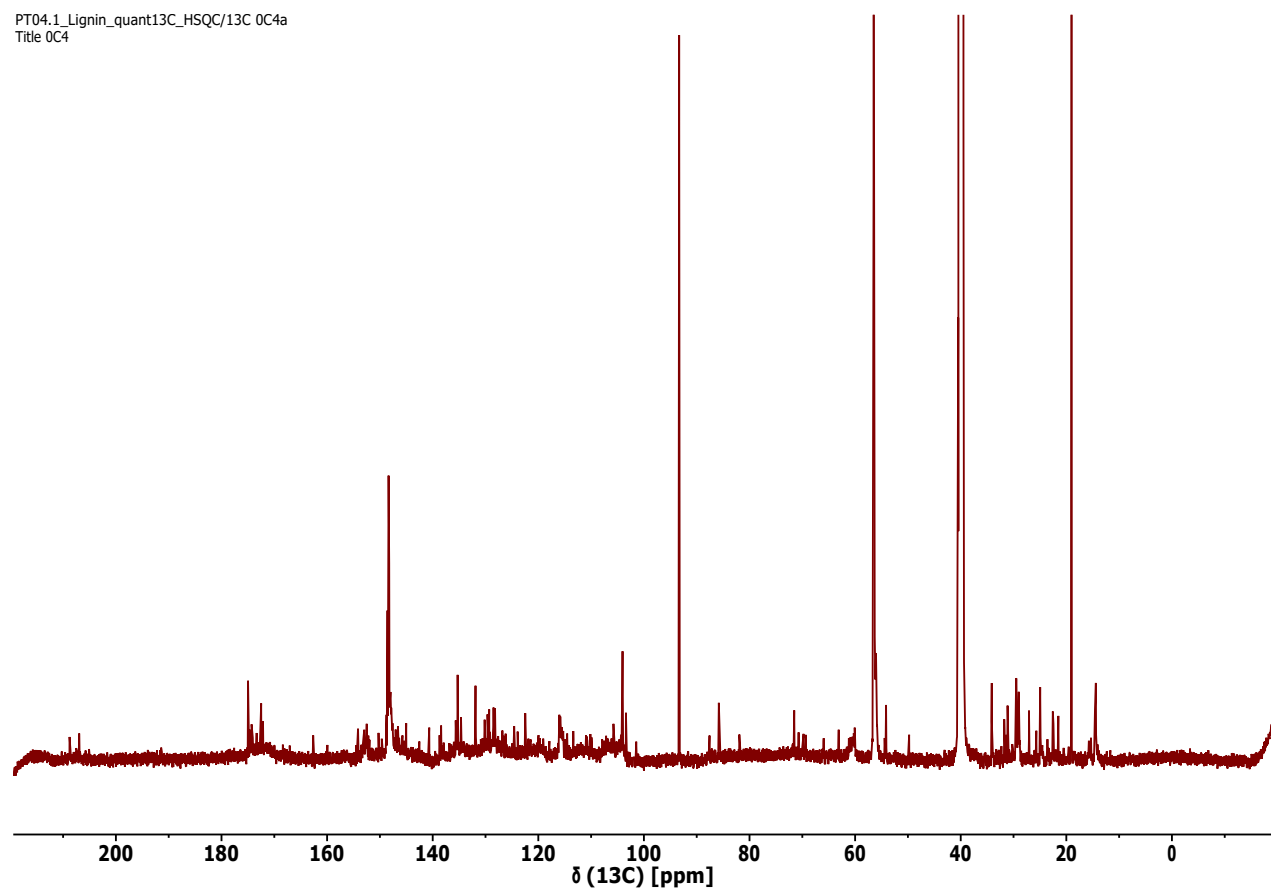

Figure S8: HSQC and quantitative <sup>13</sup>C NMR spectra of lignin sample 0C4.

PT04.1\_Lignin\_quant13C\_HSQC/HSQC 0C6a  
Title 0C6

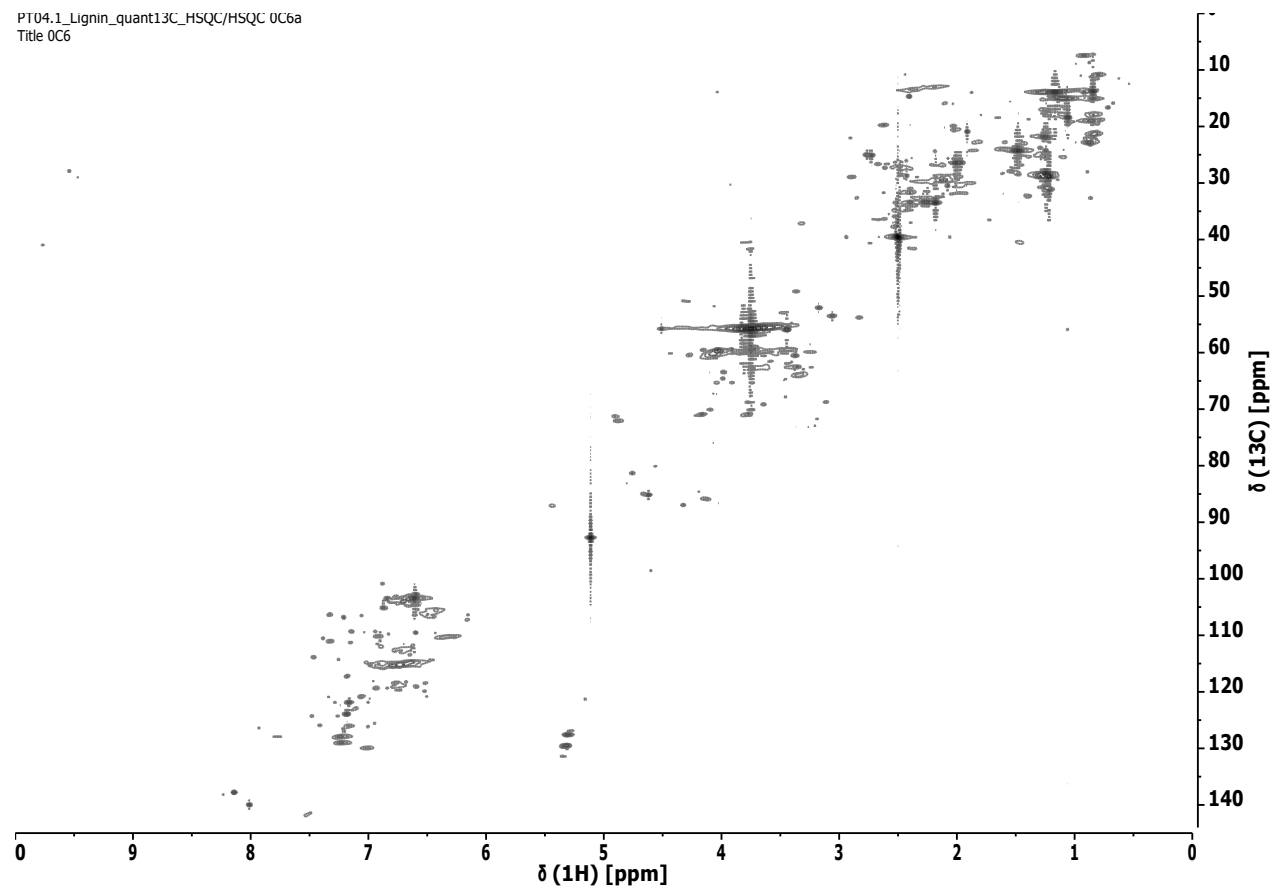

PT04.1\_Lignin\_quant13C\_HSQC/13C 0C6a  
Title 0C6

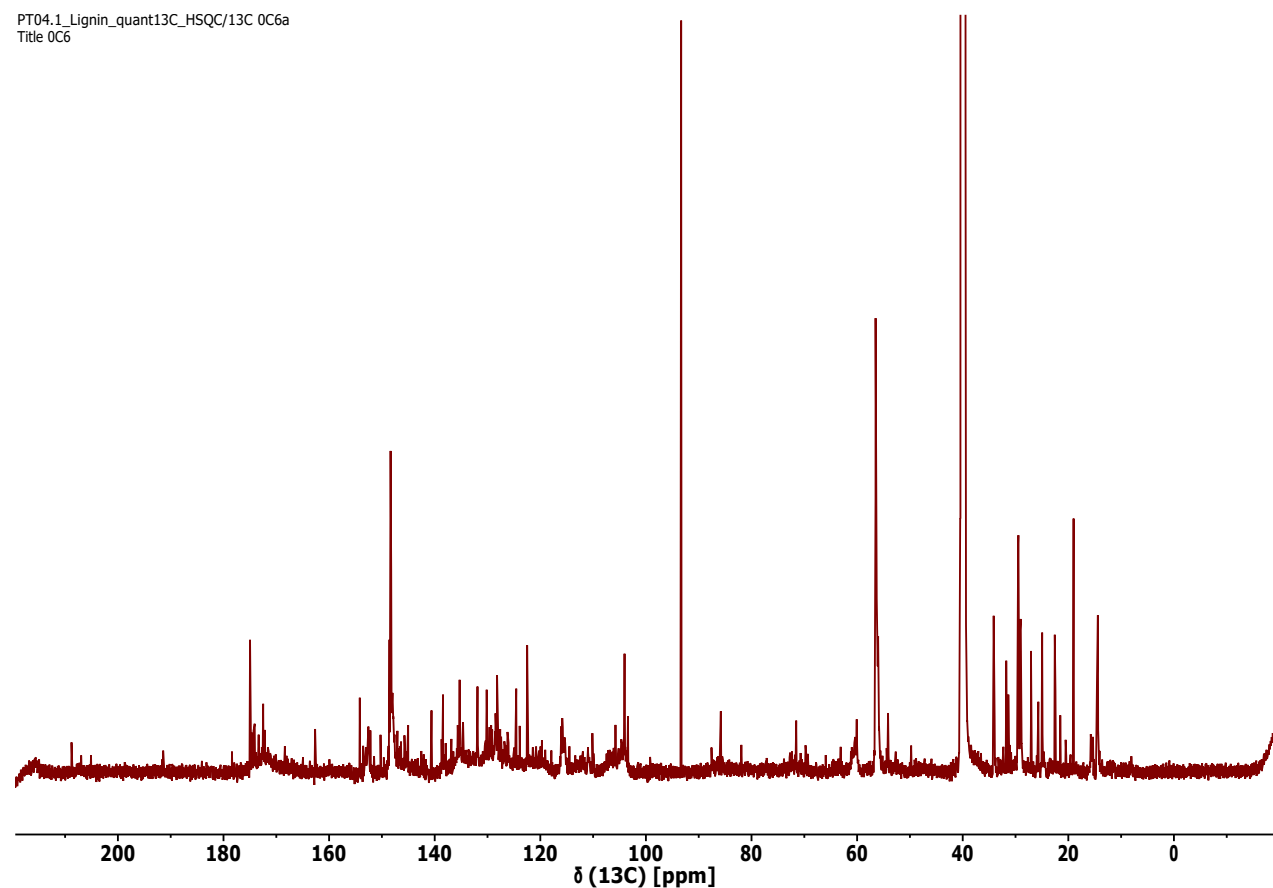

Figure S9: HSQC and quantitative <sup>13</sup>C NMR spectra of lignin sample 0C6.

PT04.1\_Lignin\_quant13C\_HSQC/HSQC 1A4a  
Title 1A4

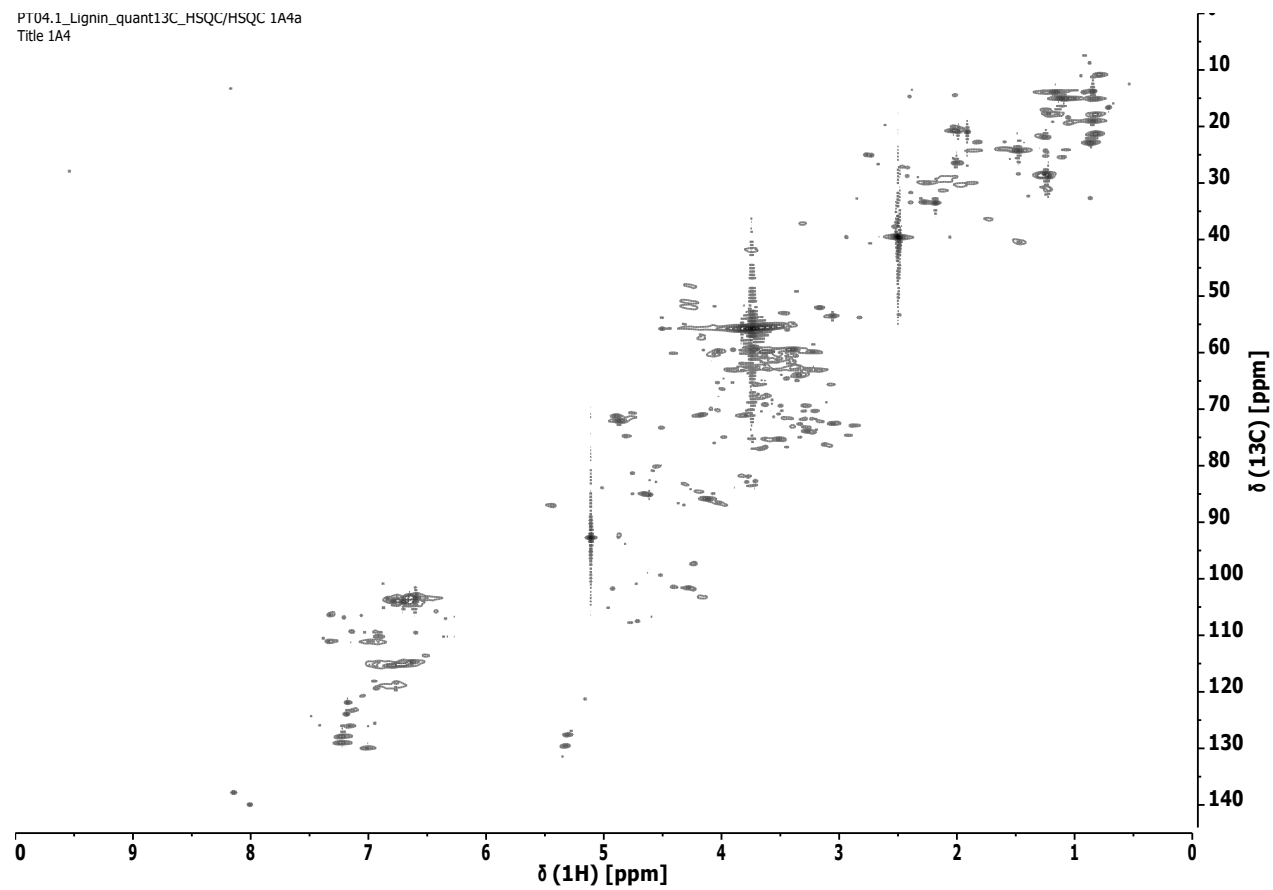

PT04.1\_Lignin\_quant13C\_HSQC/13C 1A4a  
Title 1A4

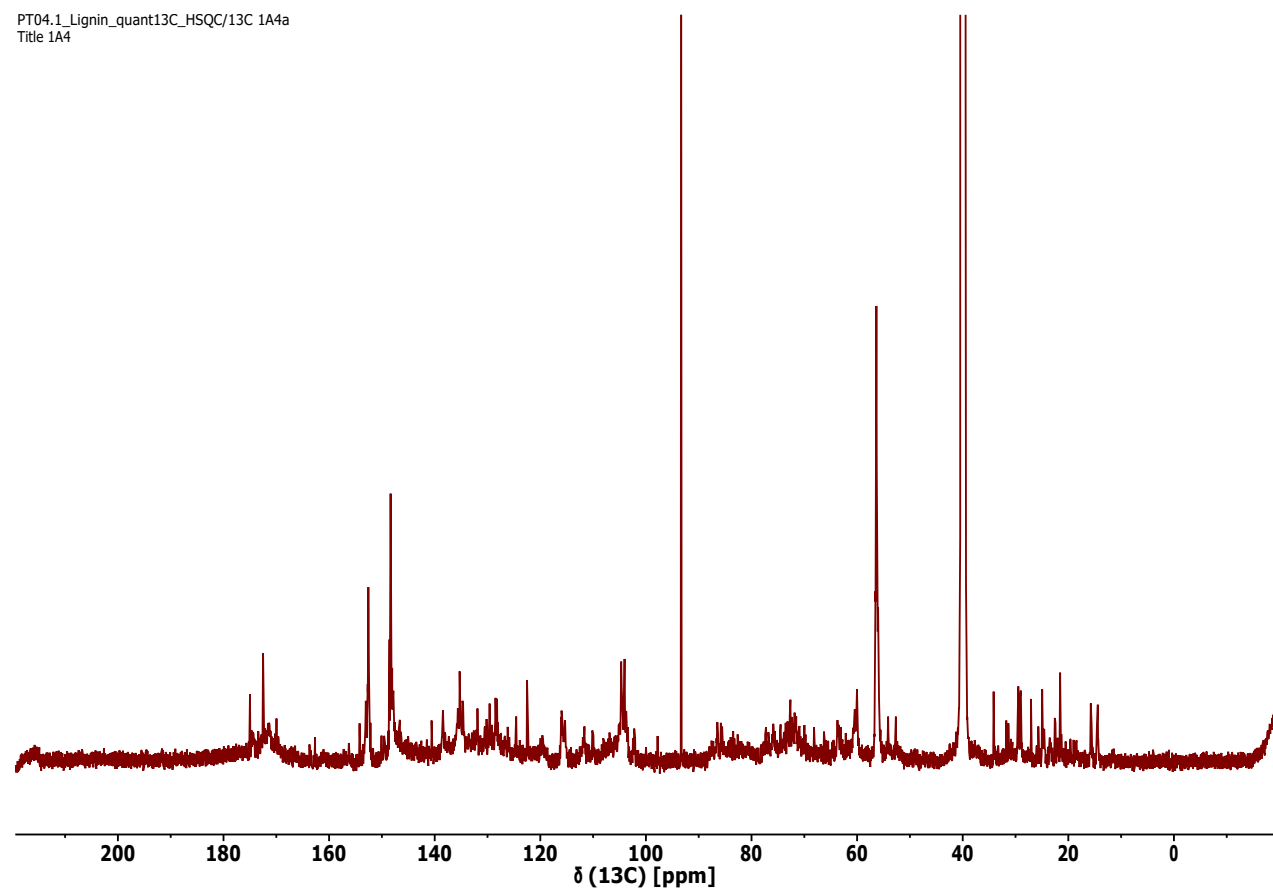

Figure S10: HSQC and quantitative <sup>13</sup>C NMR spectra of lignin sample 1A4.

PT04.1\_Lignin\_quant13C\_HSQC/HSQC 1A6a  
Title 1A6

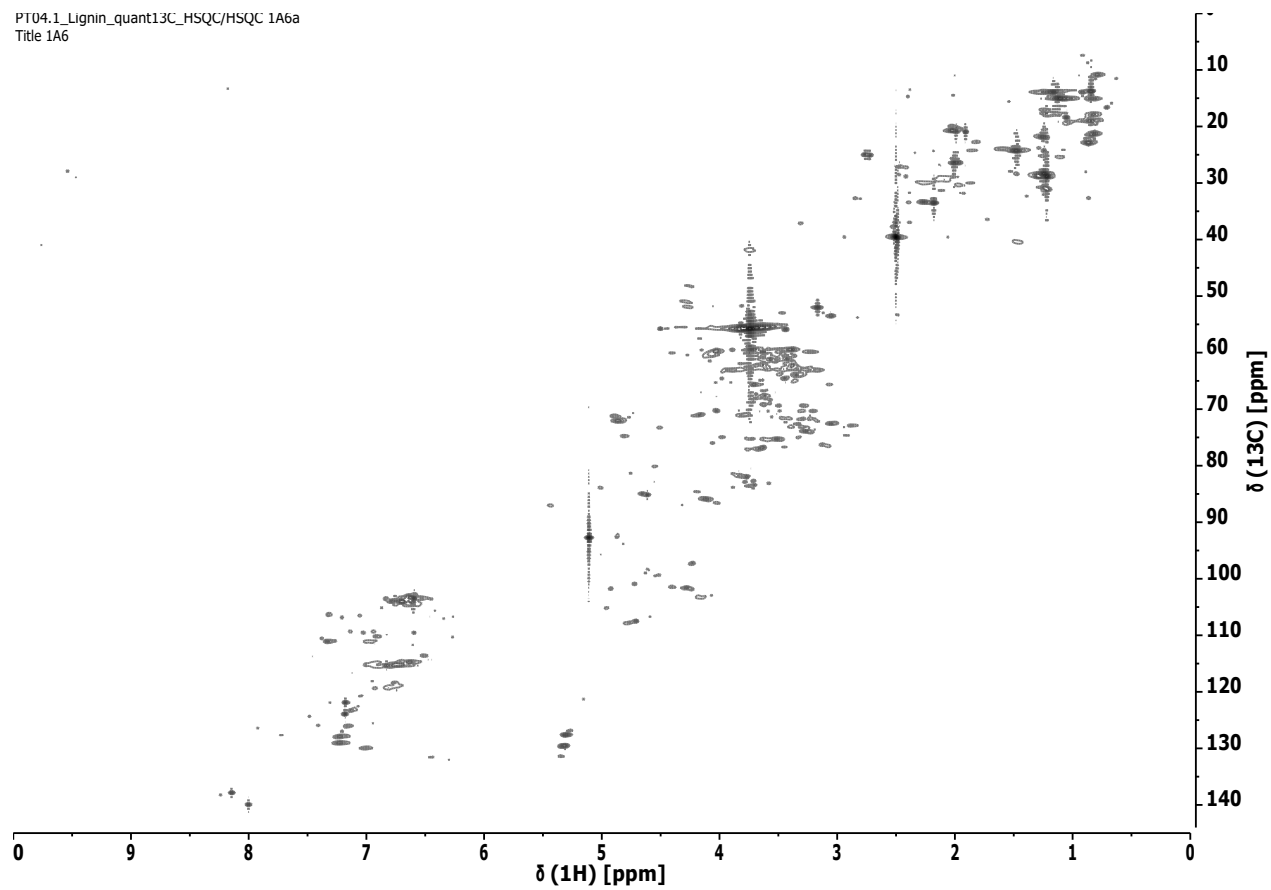

PT04.1\_Lignin\_quant13C\_HSQC/13C 1A6a  
Title 1A6

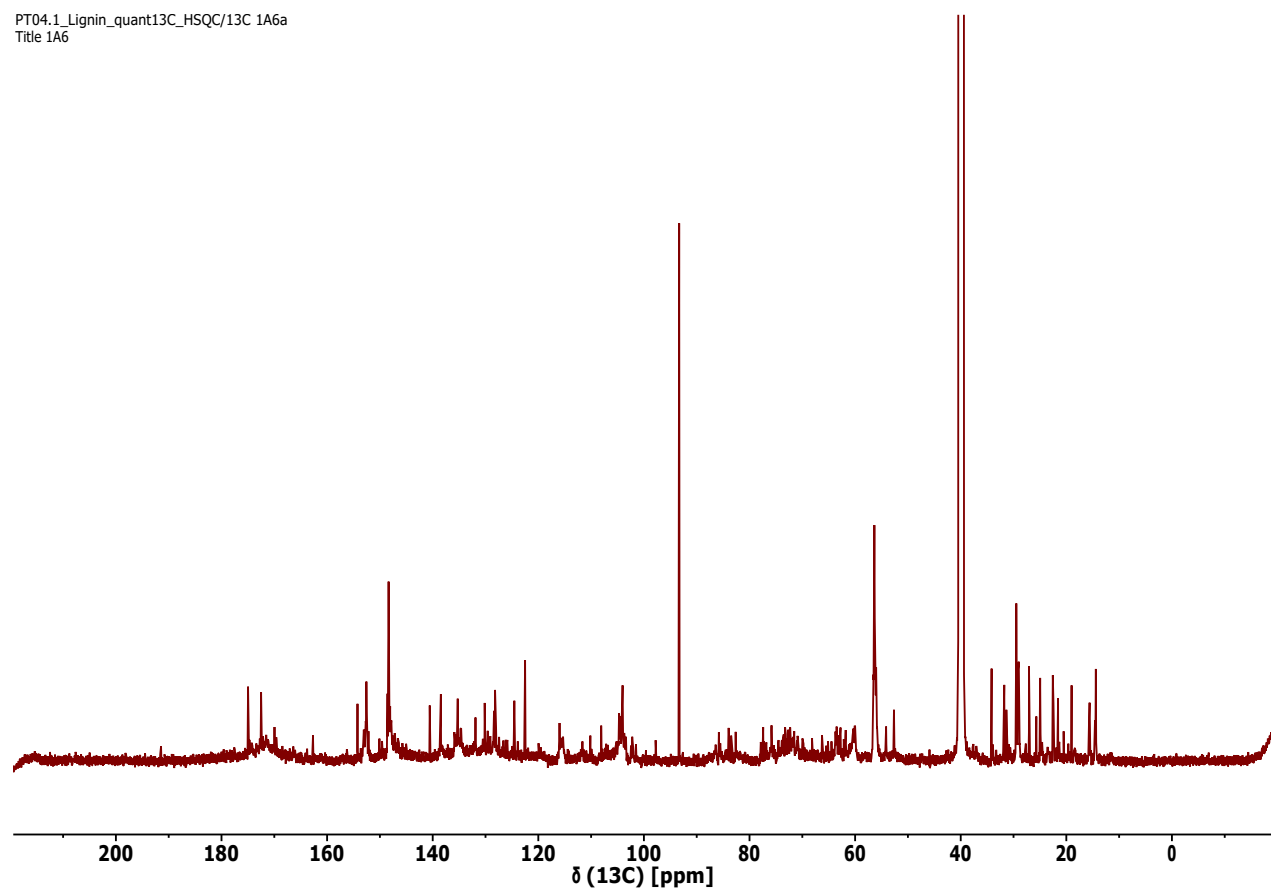

Figure S11: HSQC and quantitative <sup>13</sup>C NMR spectra of lignin sample 1A6.

PT04.1\_Lignin\_quant13C\_HSQC/HSQC 1B4a  
Title 1B4

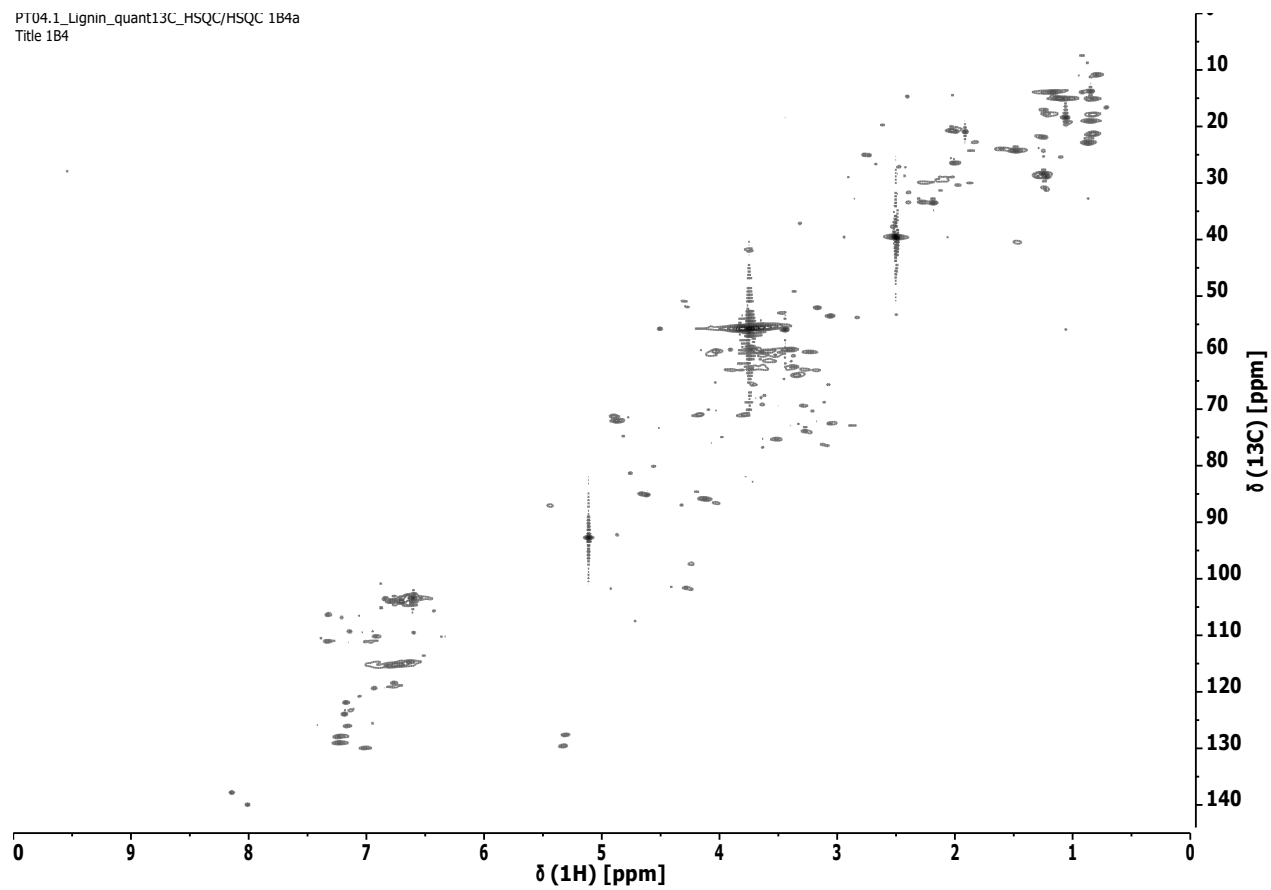

PT04.1\_Lignin\_quant13C\_HSQC/13C 1B4a  
Title 1B4

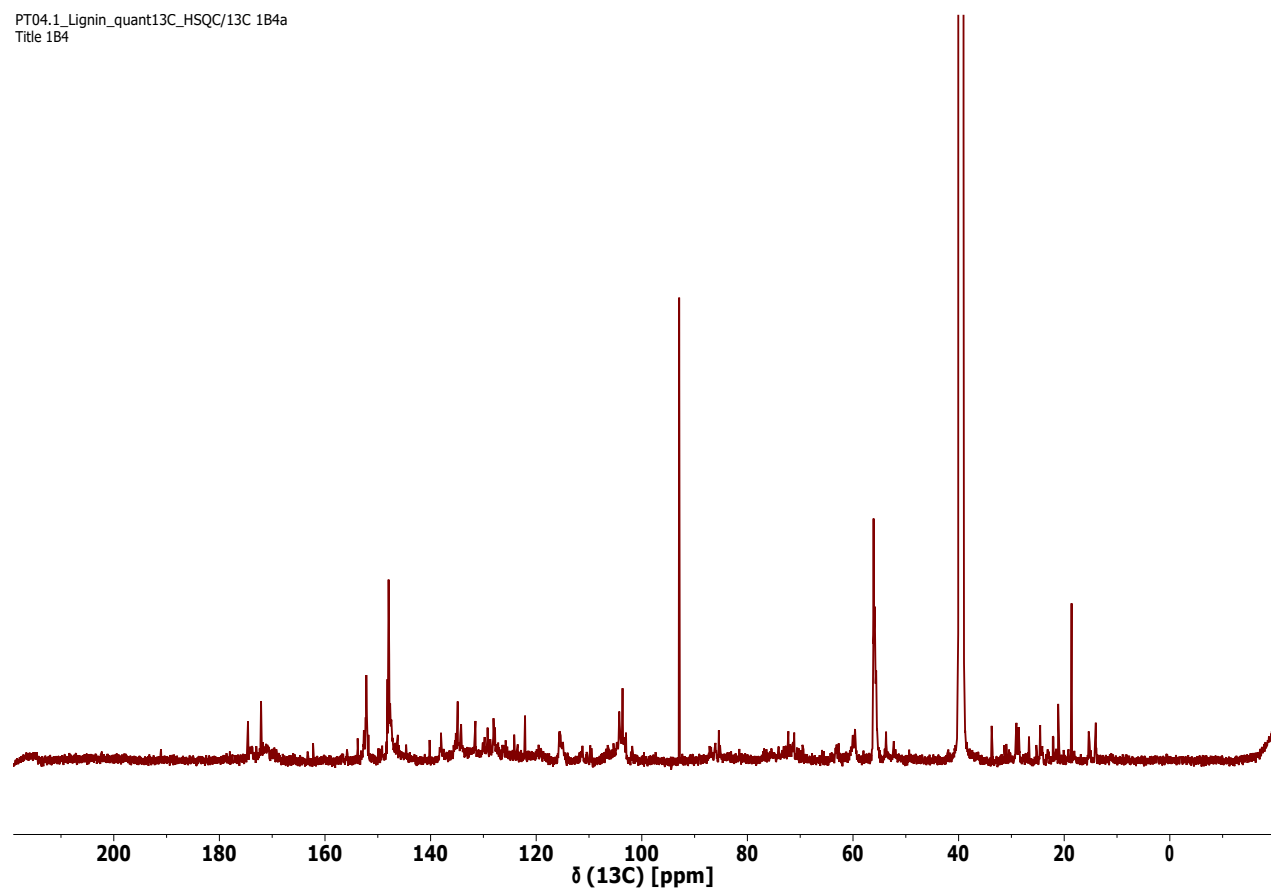

Figure S12: HSQC and quantitative  $^{13}\text{C}$  NMR spectra of lignin sample 1B4.

PT04.1\_Lignin\_quant13C\_HSQC/HSQC 1B6a  
Title 1B6

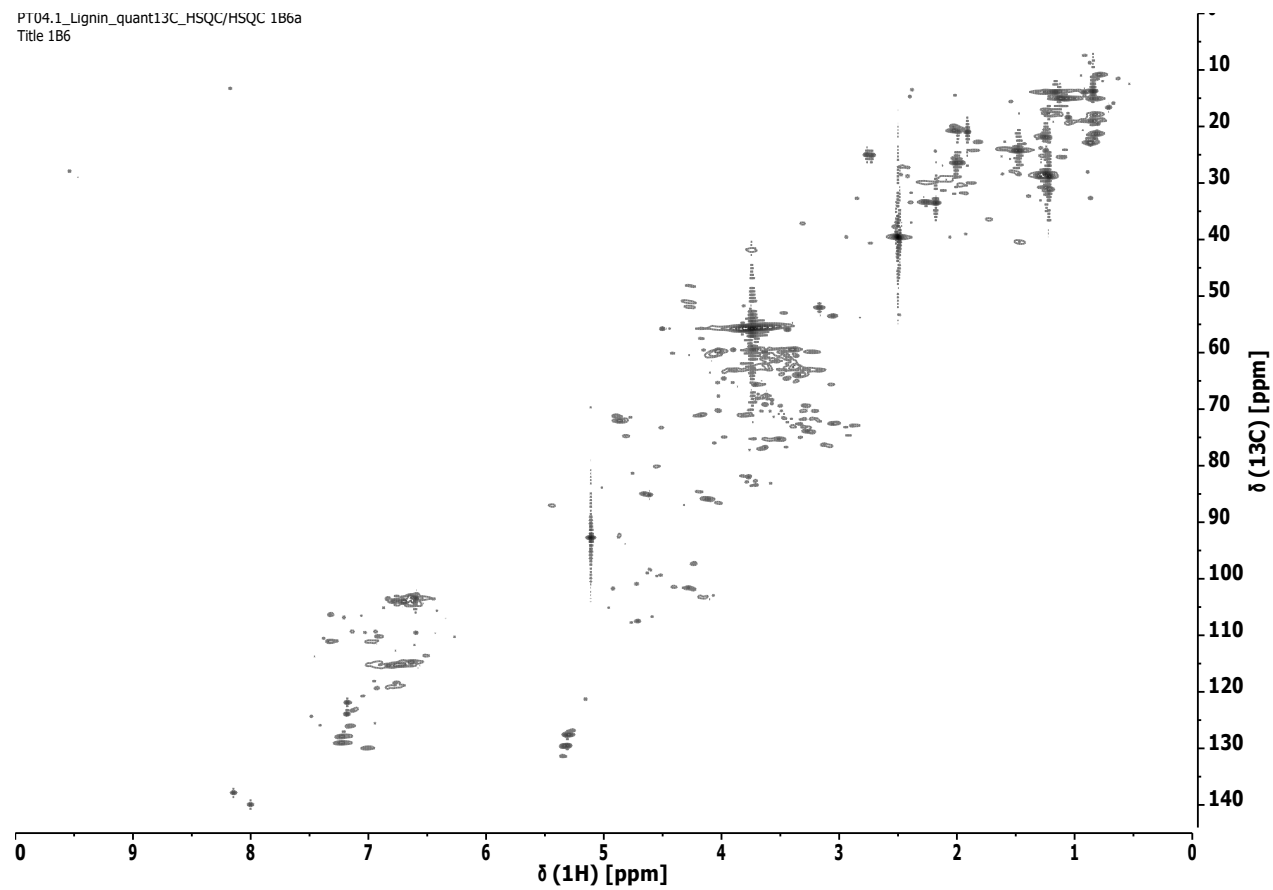

PT04.1\_Lignin\_quant13C\_HSQC/13C 1B6a  
Title 1B6

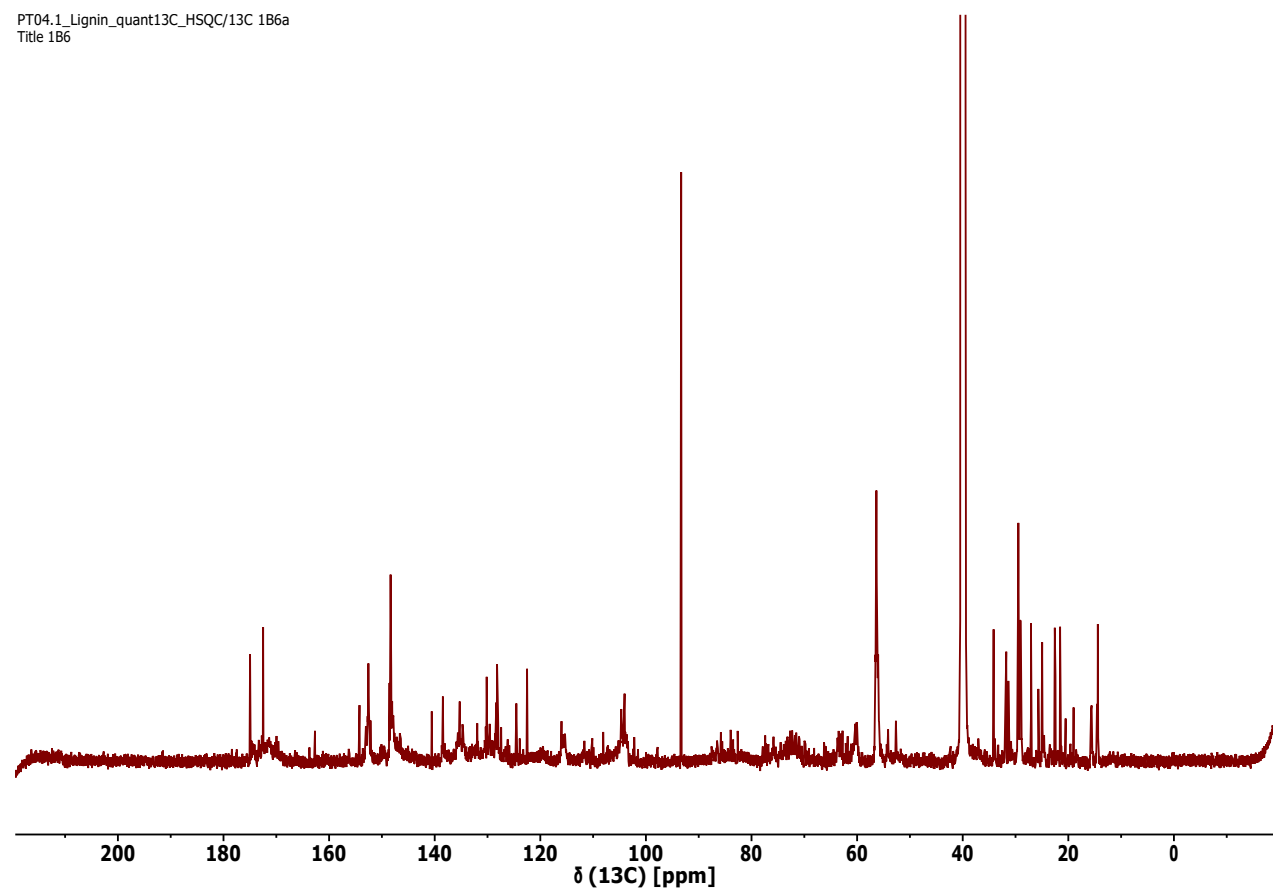

Figure S13: HSQC and quantitative <sup>13</sup>C NMR spectra of lignin sample 1B6.

PT04.1\_Lignin\_quant13C\_HSQC/HSQC 1C4a  
Title 1C4

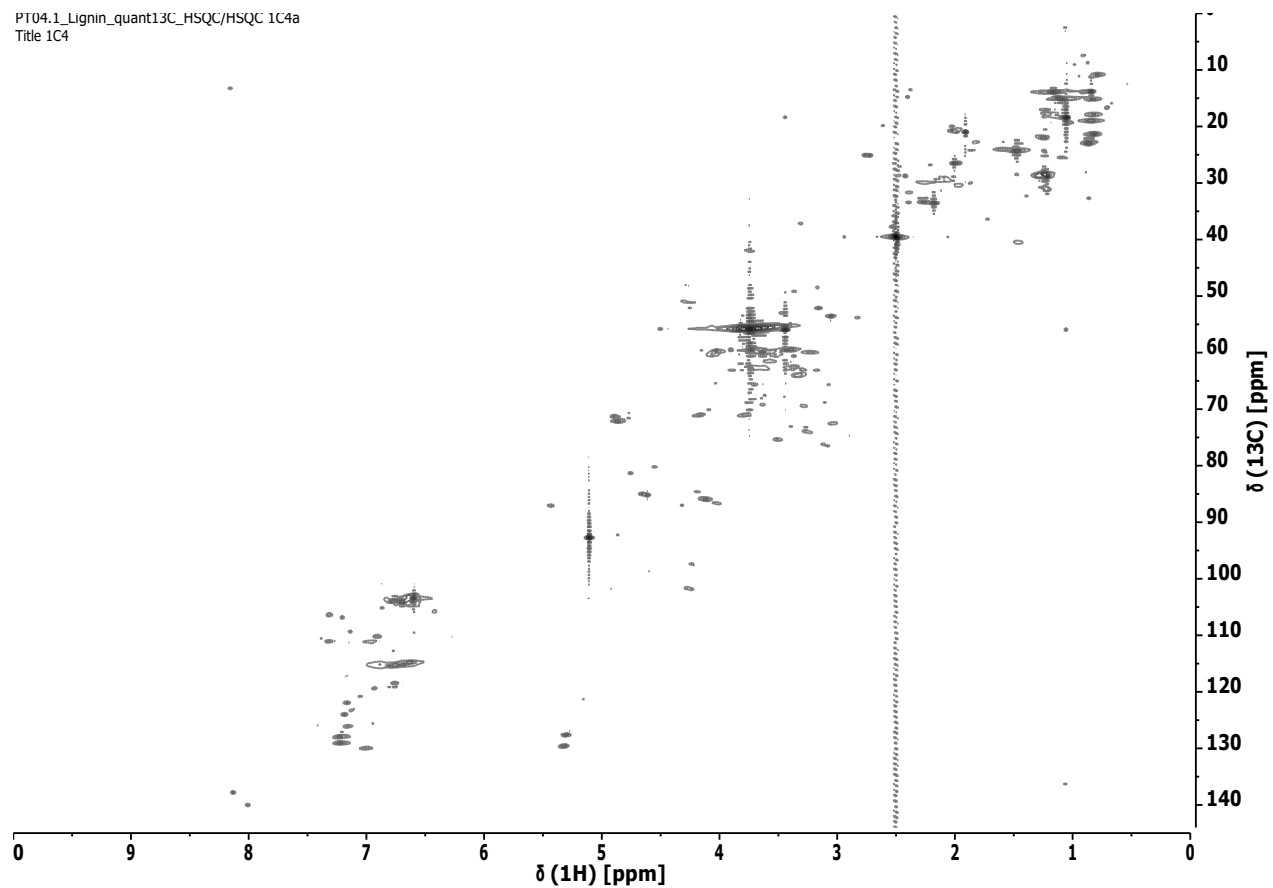

PT04.1\_Lignin\_quant13C\_HSQC/13C 1C4a  
Title 1C4

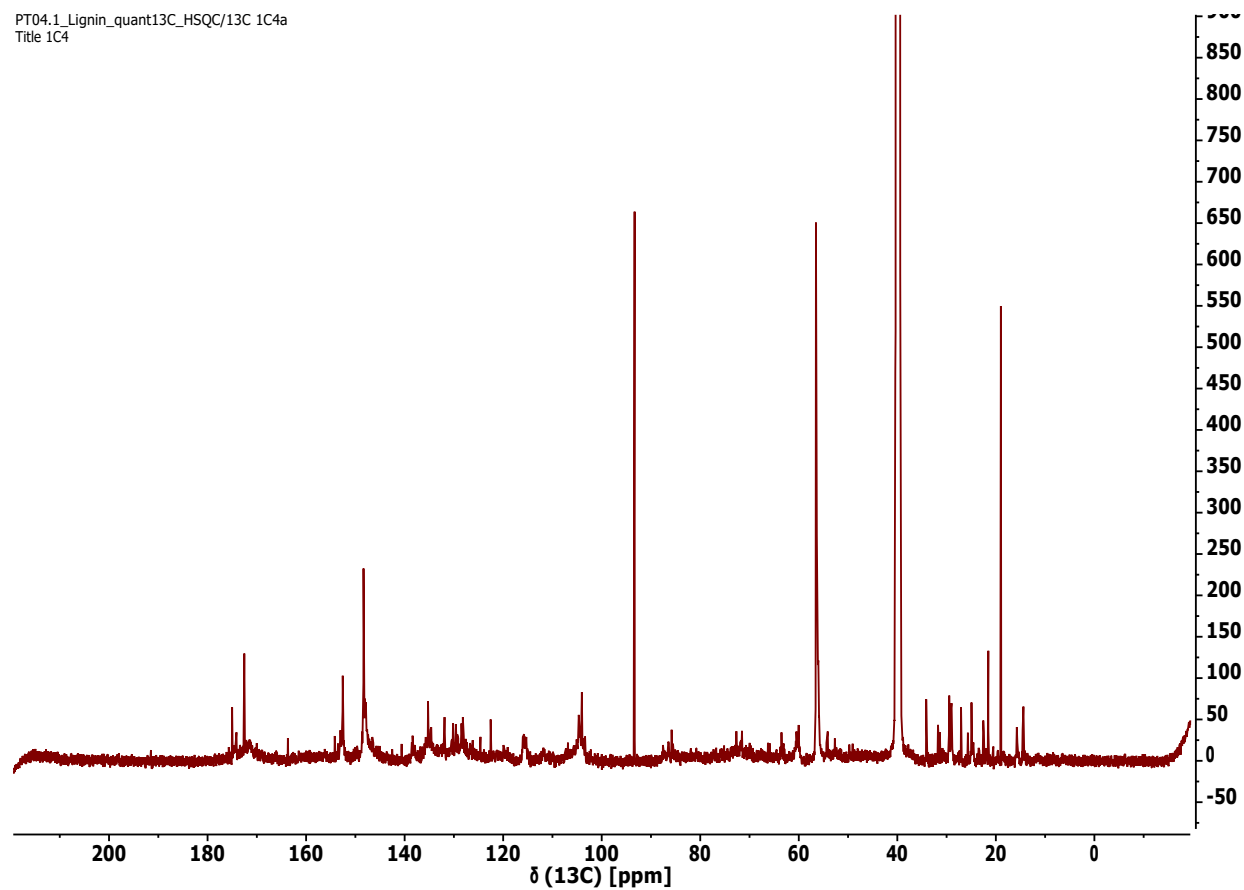

Figure S14: HSQC and quantitative <sup>13</sup>C NMR spectra of lignin sample 1C4.

PT04.1\_Lignin\_quant13C\_HSQC/HSQC 1C6a  
Title 1C6

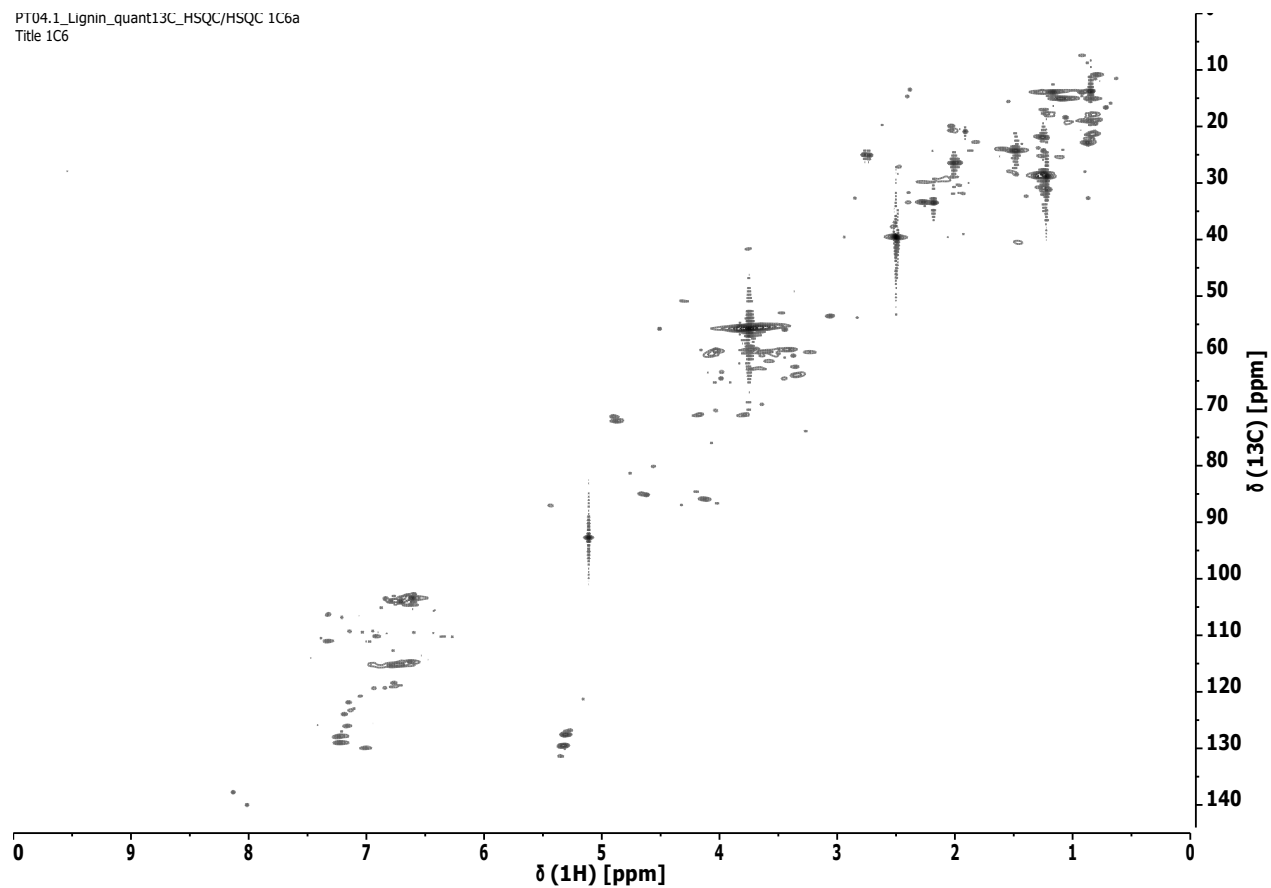

PT04.1\_Lignin\_quant13C\_HSQC/13C 1C6a  
Title 1C6

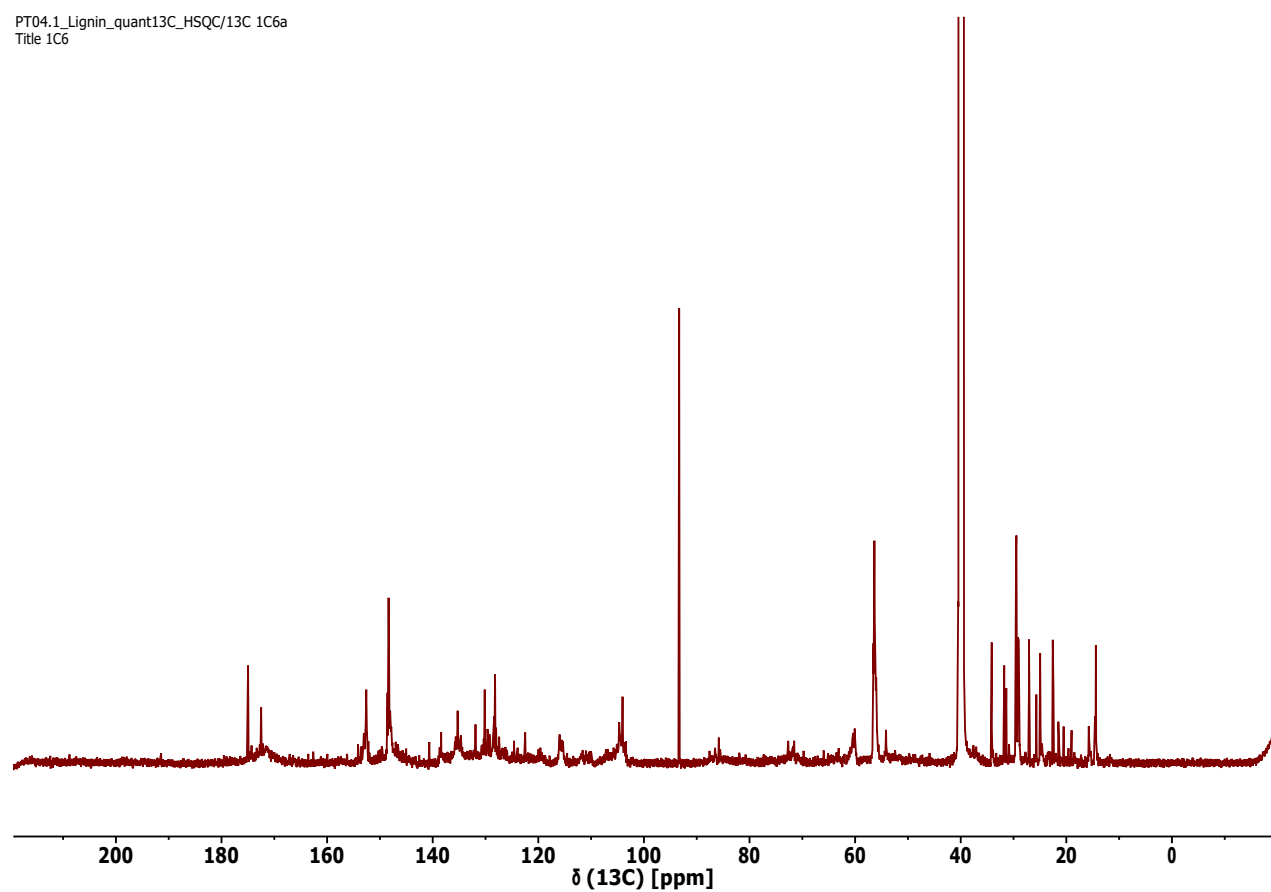

Figure S15: HSQC and quantitative  $^{13}\text{C}$  NMR spectra of lignin sample 1C6.



PT04.1\_Lignin\_quant13C\_HSQC/HSQC 1D4a  
Title 1D4

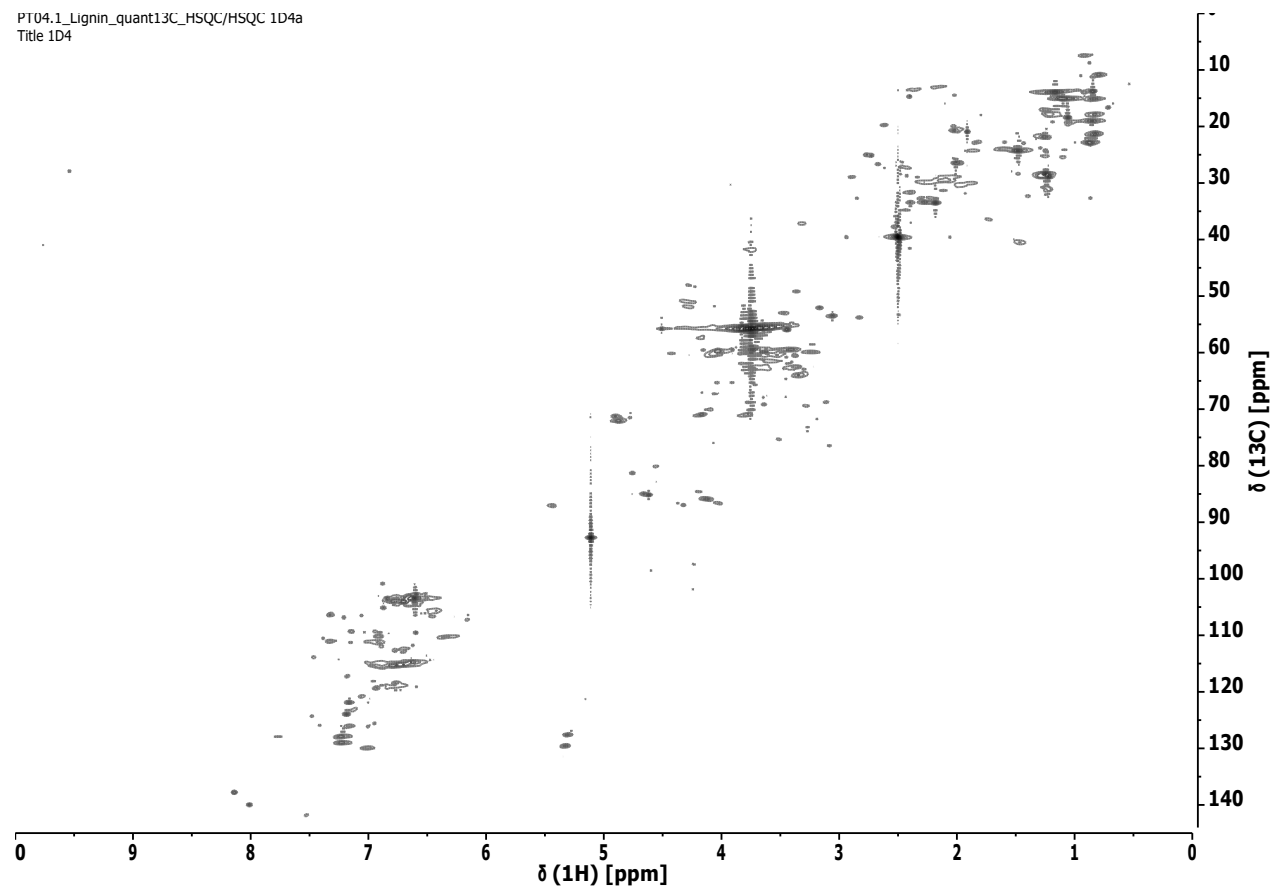

PT04.1\_Lignin\_quant13C\_HSQC/13C 1D4a  
Title 1D4

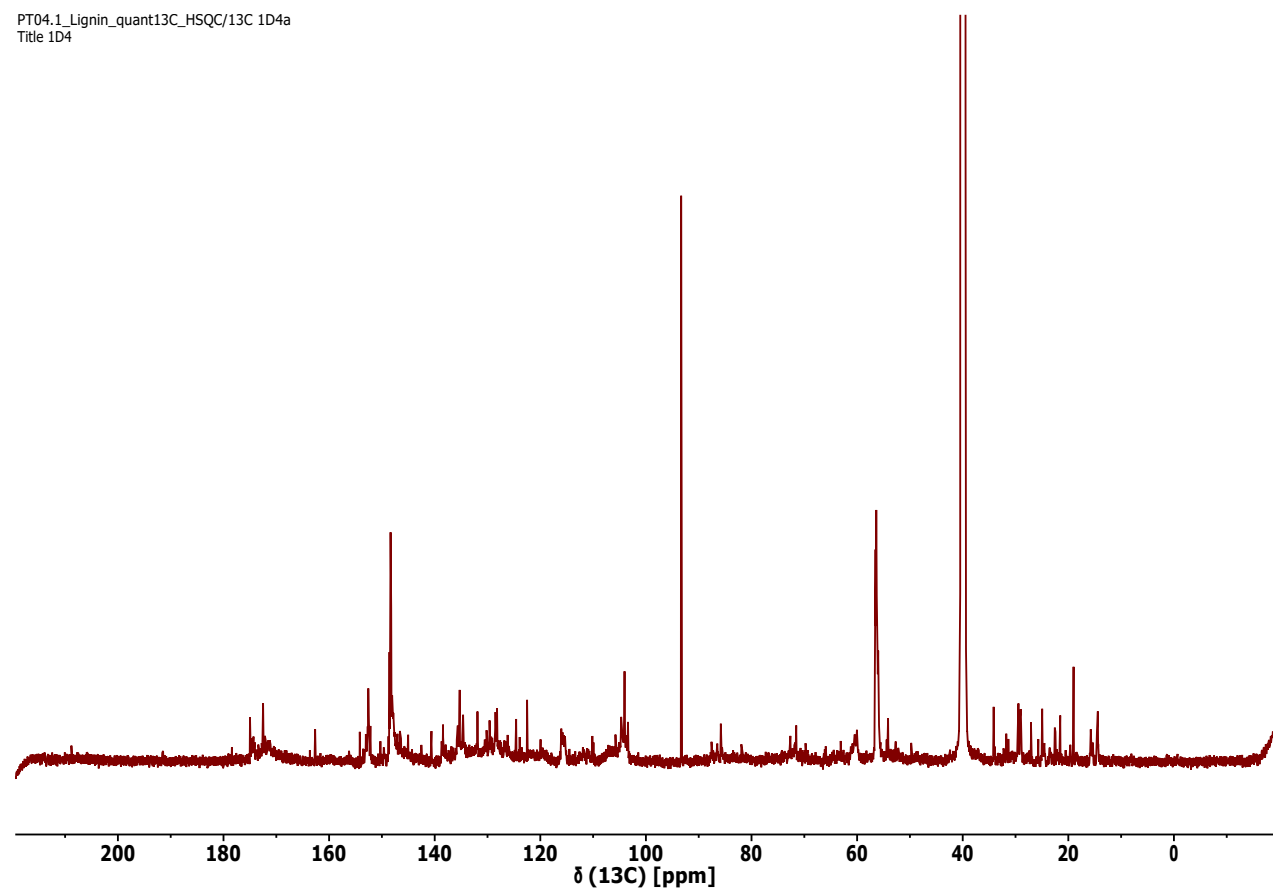

Figure S16: HSQC and quantitative  $^{13}\text{C}$  NMR spectra of lignin sample 1D4.

PT04.1\_Lignin\_quant13C\_HSQC/HSQC 1D6a  
Title 1D6

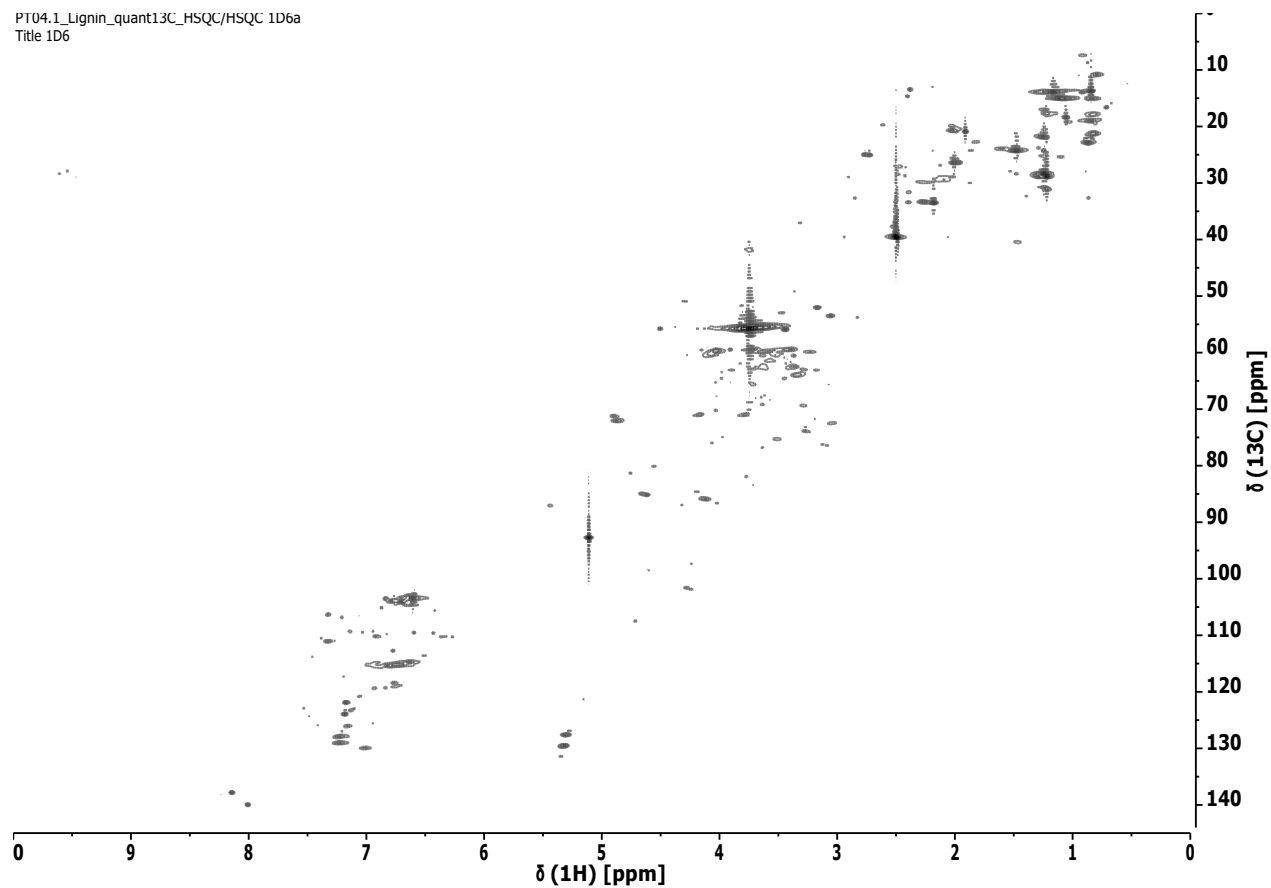

PT04.1\_Lignin\_quant13C\_HSQC/13C 1D6a  
Title 1D6

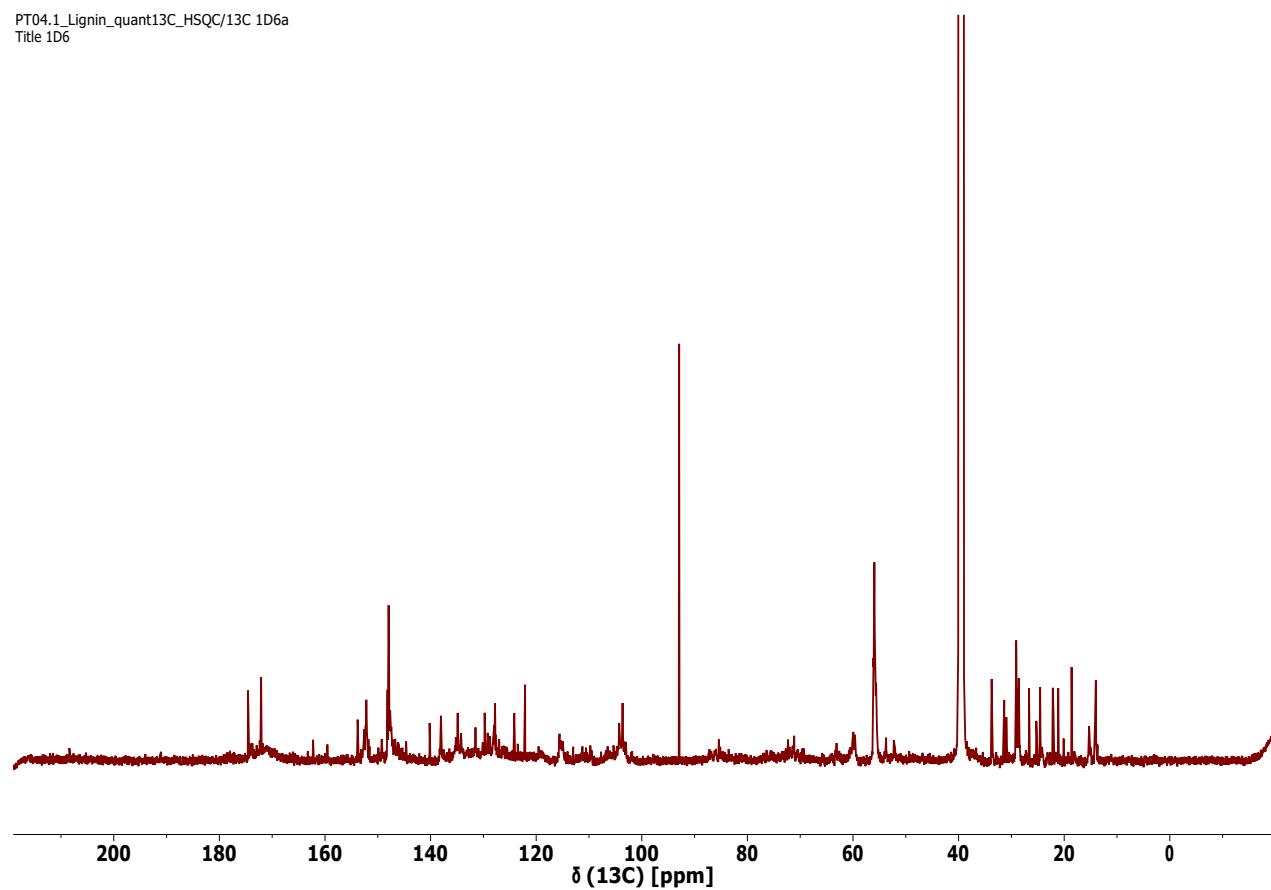

Figure S17: HSQC and quantitative <sup>13</sup>C NMR spectra of lignin sample 1D6.

PT04.1\_Lignin\_quant13C\_HSQC/HSQC 2B4a  
Title 2B4

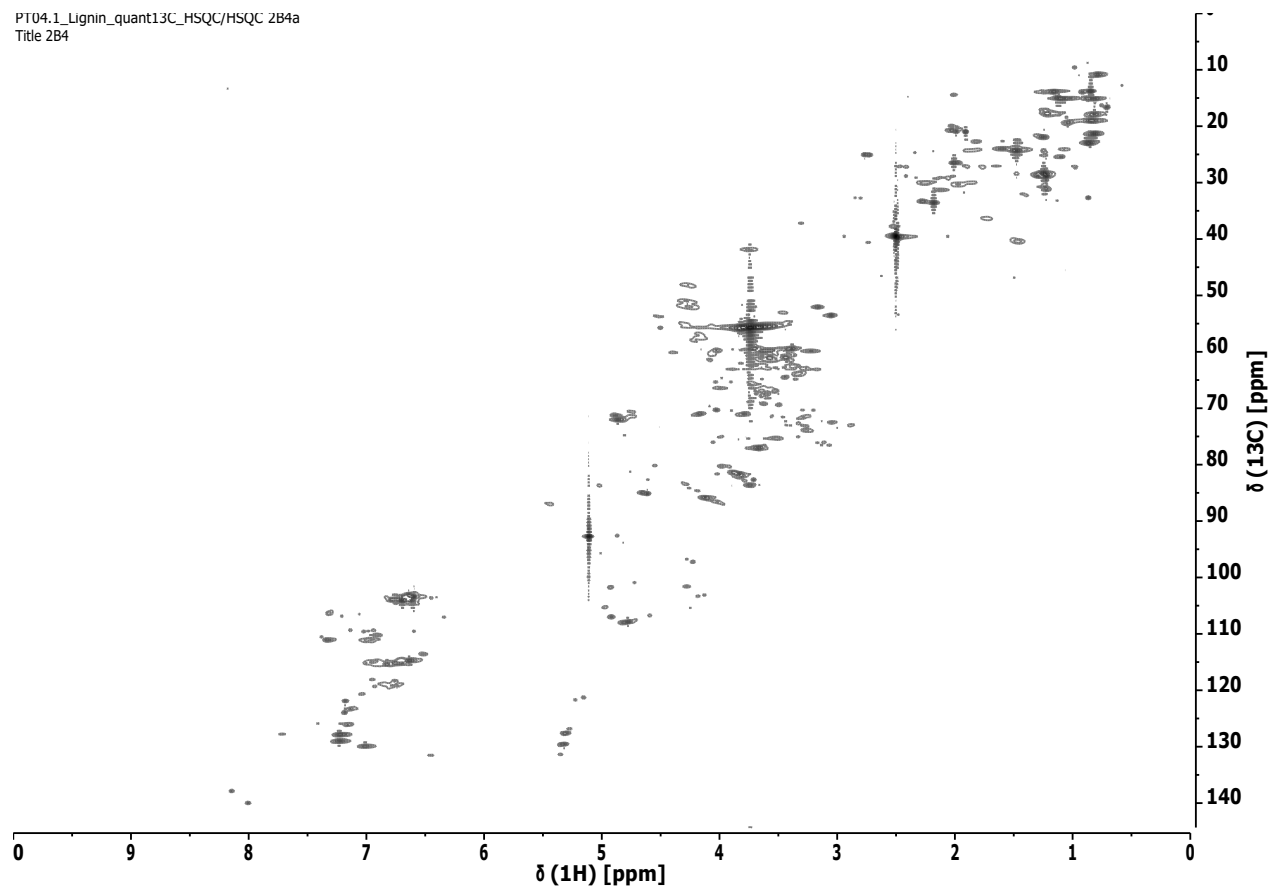

PT04.1\_Lignin\_quant13C\_HSQC/13C 2B4a  
Title 2B4

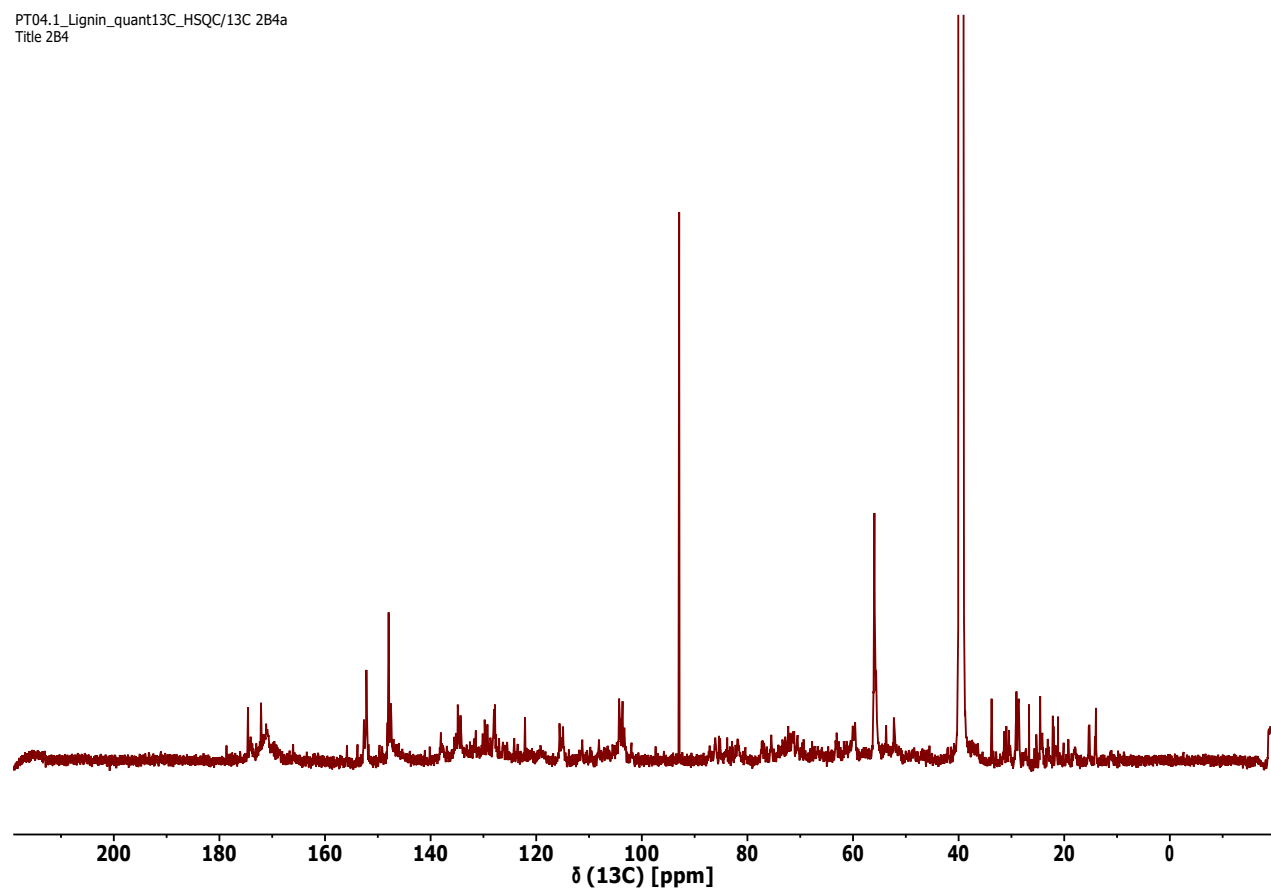

Figure S18: HSQC and quantitative <sup>13</sup>C NMR spectra of lignin sample 2B4.

PT04.1\_Lignin\_quant13C\_HSQC/HSQC 2B6a  
Title 2B6

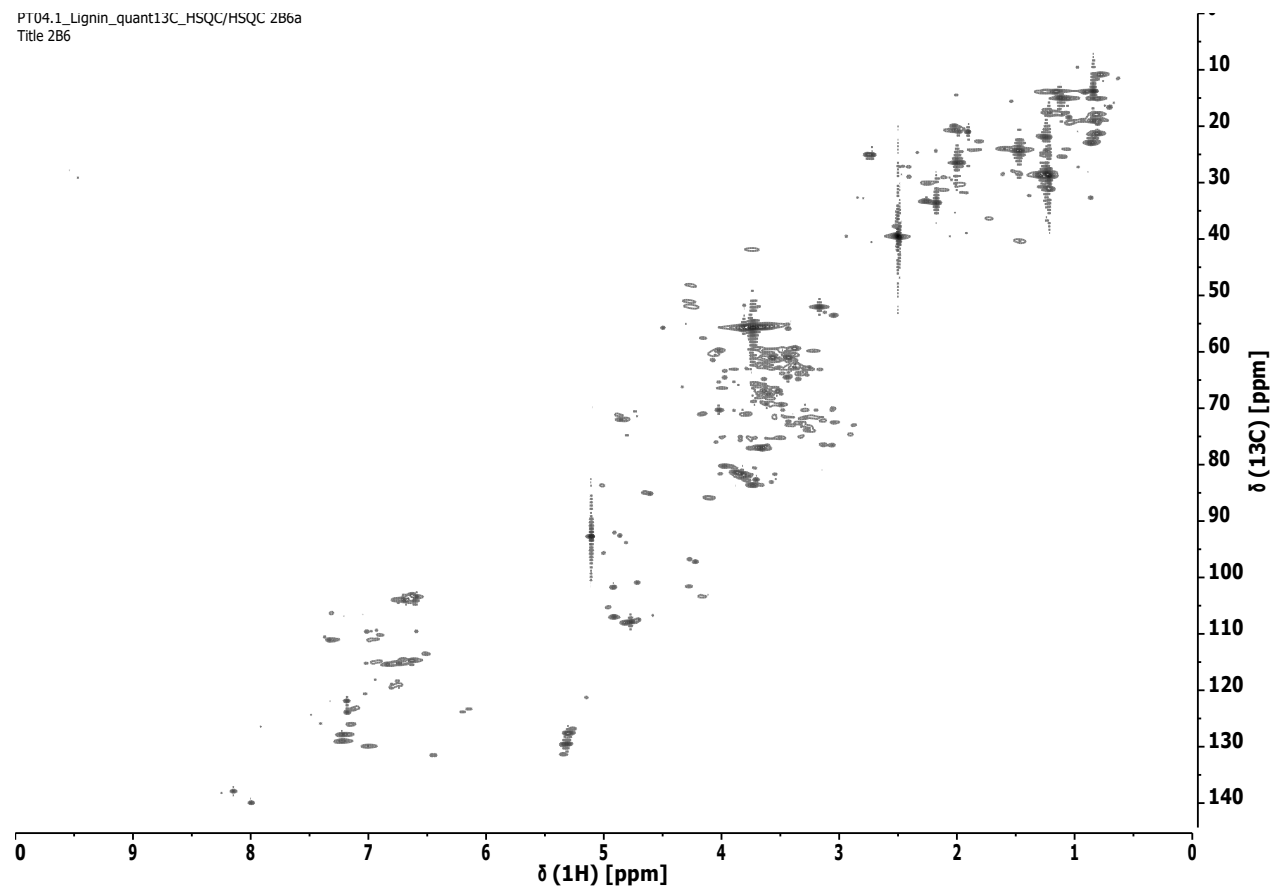

PT04.1\_Lignin\_quant13C\_HSQC/13C 2B6a  
Title 2B6

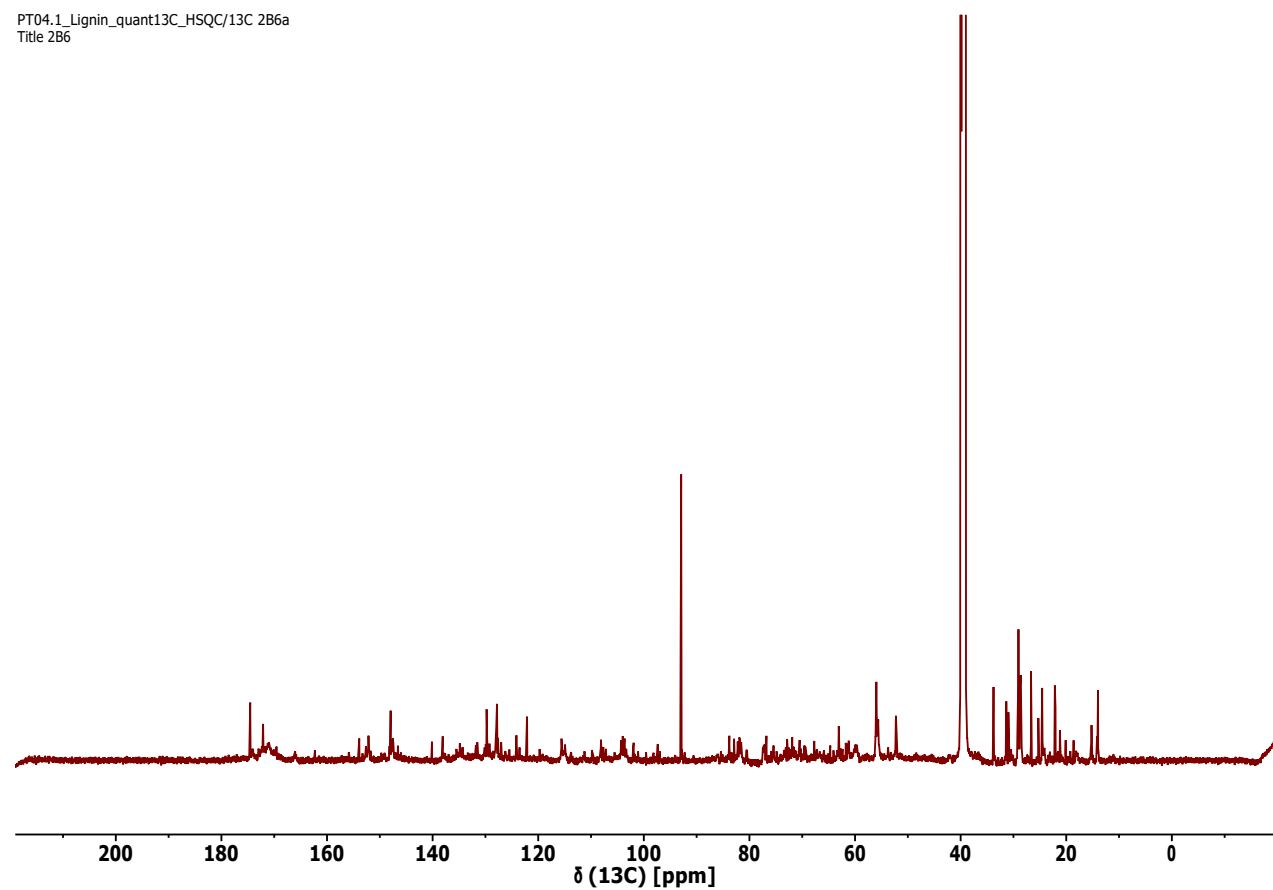

Figure S19: HSQC and quantitative <sup>13</sup>C NMR spectra of lignin sample 2B6.
